# Supplementary material for: Crash landing of Vibrio cholerae by MSHA pili-assisted braking and anchoring in a viscoelastic environment
Source: eLife. 2021 Jul 2;10:e60655. doi: 10.7554/eLife.60655 (PMC8282333; doi:10.7554/eLife.60655)
Supplement: Figure 1—source data 1. [file elife-60655-fig1-data1.xlsx]

## Sheet: Figure 1b
	MSHA pili number/cell
	8			Bin center	Relative frequency
	8			1	0
	8			2	0.09174
	8			3	0.13761
	4			4	0.26606
	4			5	0.11927
	4			6	0.14679
	6			7	0.15596
	8			8	0.06422
	7			9	0.00917
	4			10	0.00917
	6			11	0
	7
	3
	4
	5
	8
	2
	2
	7
	2
	4
	6
	6
	5
	6
	6
	3
	7
	4
	3
	4
	6
	5
	5
	4
	2
	3
	4
	7
	2
	3
	4
	7
	5
	7
	6
	5
	7
	3
	3
	9
	4
	6
	2
	6
	5
	7
	7
	2
	7
	2
	4
	3
	6
	5
	4
	5
	4
	4
	4
	6
	4
	6
	4
	7
	6
	4
	3
	3
	4
	7
	4
	5
	4
	4
	7
	4
	3
	5
	4
	3
	4
	8
	6
	2
	10
	7
	3
	4
	7
	6
	7
	3
	4
	5
	2
	3
	5
