# Supplementary material for: Crash landing of Vibrio cholerae by MSHA pili-assisted braking and anchoring in a viscoelastic environment
Source: eLife. 2021 Jul 2;10:e60655. doi: 10.7554/eLife.60655 (PMC8282333; doi:10.7554/eLife.60655)
Supplement: Figure 1—source data 2. [file elife-60655-fig1-data2.xlsx]

## Sheet: Figure 1c
	MSHA pili number/cell	Mean cell length(um)	SD
	2	1.763	0.36182
	3	2.03375	0.47986
	4	1.91981	0.5392
	5	2.53172	0.76308
	6	2.98172	0.87025
	7	3.55701	1.19871
	8	4.25835	1.06857
	9	5.04136	0.91453
	10	5.08387	0.78392
	11	5.60922	1.52861
	12	5.70821	1.21854
	13	6.66192	1.5473
	14	6.57931	1.67368
	15	6.82617	1.6746
	16	8.8856	1.58743
	17	7.8645	1.05207
	18	8.72714	1.01629
	19	9.4054	1.4692
	20	9.37033	0.91003
