# Supplementary material for: Crash landing of Vibrio cholerae by MSHA pili-assisted braking and anchoring in a viscoelastic environment
Source: eLife. 2021 Jul 2;10:e60655. doi: 10.7554/eLife.60655 (PMC8282333; doi:10.7554/eLife.60655)
Supplement: Figure 2—source data 1. [file elife-60655-fig2-data1.xlsx]

## Sheet: Figure 2a
x axis	y axis	z axis	color map
x position (μm)	y position (μm)	speed (μm/s)	angle (rad)
9.30338	19.3054	1.51538	-0.66701
9.4931	19.1174	2.50176	-0.41129
9.65428	18.919	3.25382	-0.20889
9.96011	18.7277	3.79654	-0.05475
10.327	18.2271	4.15491	0.05622
10.6814	17.9091	4.35389	0.12907
11.1441	17.5962	4.41848	0.16888
11.6392	17.3399	4.37364	0.18071
12.1985	17.0477	4.24435	0.16964
12.5571	16.7194	4.0556	0.14074
12.8436	16.3761	3.83235	0.09908
13.0338	16.0662	3.78429	0.04629
13.541	15.8418	3.69913	0.02935
14.1487	15.6245	3.48134	0.03436
14.6376	15.4196	3.64294	-0.000220681
15.0957	15.2978	3.46502	-0.03346
15.3414	15.0082	3.64844	-0.0848
15.4391	14.7638	3.80351	0.0602
15.487	14.4977	3.98246	-0.08481
15.986	14.4199	4.05437	-0.17776
16.5283	14.5699	4.02442	-0.25025
17.1628	15.0179	3.90393	-0.21842
17.638	15.1577	3.71879	-0.33745
18.0678	15.0983	3.67288	-0.20719
18.6904	15.4749	3.54848	-0.10442
18.9189	15.6752	3.28385	0.10426
19.5018	16.2479	3.01491	0.28274
19.7435	16.376	2.64519	0.42087
19.6684	16.1538	2.18215	0.29981
19.5439	16.296	1.74298	0.60388
19.4173	16.3524	1.45446	0.49971
19.2708	16.3379	1.25906	0.46088
19.2369	16.3829	1.03582	0.58179
19.2727	16.1258	0.82736	0.90402
19.3532	16.1562	0.85675	1.08954
19.3772	16.2201	0.68686	1.08608
19.5982	16.2991	0.7392	0.95774
19.6996	16.3282	0.79833	0.74356
19.7409	16.3407	0.86496	0.24574
19.6845	16.3054	0.93687	0.20246
19.6345	16.0963	0.94875	0.0405
19.5998	16.0913	0.94635	-0.11143
19.5002	15.9209	0.84569	-0.27326
19.4385	16.0072	0.88647	-0.06484
19.4064	15.9511	0.86854	-0.04271
19.376	15.9315	0.75853	0.05195
19.3829	15.8623	0.84406	0.24313
19.7884	15.8086	0.88092	0.41632
19.8504	15.8756	0.8566	0.54365
19.8112	15.9314	0.79492	1.07501
19.8209	15.926	0.75701	1.1017
19.8219	15.9714	0.70624	1.45058
19.7578	15.9731	0.76762	1.92775
19.6251	15.9299	0.75005	2.23101
19.5355	16.0059	0.54713	2.15849
19.463	16.009	0.50507	1.95
19.3225	15.8358	0.24582	1.66999
19.3132	15.9099	0.52941	1.42909
19.2995	15.9446	0.91467	1.22003
19.2915	15.9825	1.21424	1.08626
19.3724	15.9533	1.56905	0.70371
19.6072	15.9401	1.89413	0.43244
19.7283	15.9386	2.1647	0.20874
19.7977	15.8931	2.68463	0.06853
19.9473	15.9584	2.96731	-0.07584
20.4818	16.1289	3.21913	-0.14775
20.8118	16.2838	3.63675	-0.09316
21.2976	17.146	3.70763	-0.16278
21.6531	17.7398	3.78094	-0.13413
21.946	17.9635	4.05535	-0.01855
22.412	18.2489	4.31864	0.09184
22.6465	18.5836	4.41372	0.08607
22.8646	19.0038	4.23304	0.11431
23.2776	19.4478	3.90632	0.09684
23.4214	19.5646	3.38778	0.07574
23.8783	19.821	3.21592	0.07623
24.3682	19.983	2.96758	0.01428
24.5639	20.2209	3.18986	0.03722
24.7618	20.9641	3.3185	0.09974
25.1545	21.6019	3.32981	0.14572
25.2698	21.8264	3.25363	0.18127
25.2742	21.8213	3.12957	0.20176
25.3882	21.9524	3.14048	0.21968
25.7096	22.1228	3.12663	0.16588
26.0827	22.2861	2.89631	0.13101
26.7562	22.5739	2.88509	0.09951
27.2897	22.5781	2.91527	0.05321
27.7713	22.5384	2.90945	0.02105
28.0838	22.4376	3.12007	0.09294
28.2555	22.1633	3.39397	0.09052
28.359	22.0307	3.52869	0.2353
28.6073	21.6314	3.20752	0.04916
29.0223	21.4107	3.06707	-0.01194
29.2425	21.2331	2.98653	-0.06379
29.7533	21.1815	3.01863	-0.15946
30.2745	21.2366	3.32124	-0.02236
30.7408	21.1403	3.4932	-0.02434
31.1824	20.9992	3.62905	-0.22503
31.3615	20.7602	3.58248	-0.30896
31.4075	20.3651	3.38475	-0.05139
31.6989	20.0324	3.13039	-0.19097
31.6396	19.8189	2.9725	-0.25578
32.2437	19.458	2.76299	-0.292
32.6737	19.2541	2.4596	-0.27054
33.0598	18.9193	2.31817	-0.10498
33.361	18.8211	2.20788	-0.03071
33.2434	18.7857	2.10073	0.04818
33.2272	18.6546	1.94774	0.31413
33.2092	18.7205	1.69737	0.46283
33.1429	18.8328	1.49611	0.73999
32.8307	18.7806	1.33274	0.88131
32.9146	18.9068	0.95114	0.95293
33.0235	19.0413	0.77899	1.01462
33.0669	19.3049	0.38228	1.24876
33.2927	19.2789	0.65875	1.45754
33.3916	19.1941	0.94273	1.66152
33.4434	19.2645	1.17158	1.58757
33.4421	19.2851	1.41975	1.47001
33.5168	19.2533	1.50303	1.56123
33.546	19.3137	1.61659	1.63934
33.5521	19.2716	1.87224	1.23728
33.5655	19.2896	2.257	1.14462
33.7496	19.1901	2.64223	1.06038
33.7655	19.7057	2.97527	1.01376
34.8645	19.2726	3.3564	0.84283
35.2438	19.1147	3.97187	0.35914
35.9526	18.5786	4.16599	0.22082
36.4018	18.8804	4.19198	0.18323
36.9207	19.2178	4.19428	0.03196
37.451	19.6658	3.93991	-0.03492
37.7715	19.8538	3.75647	-0.13832
38.0978	19.936	3.75585	-0.02172
38.5788	20.1418	4.28917	0.04805
38.6827	20.5467	4.37704	0.1374
38.7796	21.4575	4.1111	0.07121
38.8107	22.0553	3.87119	0.01085
38.9377	22.4613	3.67658	-0.04987
39.173	22.8183	3.78881	-0.0734
39.1858	23.3811	3.88922	-0.08598
39.3048	23.7536	3.82626	-0.13452
39.2322	24.3765	3.64294	-0.16147
39.2498	24.9088	3.43479	-0.23342
39.3717	25.2991	3.47895	-0.28075
39.5154	25.383	3.42685	-0.32817
39.7061	25.3133	3.78534	-0.27763
39.6596	26.0818	3.84698	-0.29569
39.3952	26.7891	4.01289	-0.28231
39.3615	27.4262	4.21915	-0.24157
39.5095	27.6333	4.43131	-0.17563
39.6864	27.8424	4.54053	-0.19492
39.28	28.4389	4.66528	-0.17347
38.8676	29.0611	4.89252	-0.08719
38.3843	29.7094	4.84838	-0.00225
38.1808	30.2453	4.79755	0.06873
37.8422	30.7936	4.74599	0.14266
37.5742	31.1874	4.84369	0.09502
36.9166	31.7505	4.82011	0.08138
36.5202	32.1789	4.77816	0.12568
36.4644	32.6197	4.26734	0.02029
36.3836	33.1285	3.82808	-0.07385
36.1717	33.5506	3.6167	-0.11594
35.6526	33.9834	3.45975	-0.13918
35.4988	34.3642	3.45008	-0.1012
35.2278	35.0682	3.23938	-0.1095
35.3958	35.437	3.18554	-0.0984
35.4502	35.3348	2.97975	-0.18022
35.475	35.5165	3.04989	-0.14882
35.4842	35.8812	3.17575	-0.10444
35.5371	36.1431	3.26741	-0.04481
35.5501	36.82	3.28661	-0.000543483
35.7773	37.2334	3.22464	0.00802
35.9891	37.6516	3.41988	0.11975
36.2205	38.0656	3.35683	0.14511
36.4769	38.3165	3.57686	0.23067
36.7873	38.7903	3.69532	0.29112
36.8124	39.2094	3.69436	0.17218
36.9684	39.7601	3.54464	0.1951
37.2111	40.3246	3.52588	0.2107
37.4018	40.6351	3.33401	0.08756
37.6224	40.7296	3.4479	0.08988
37.984	40.8849	3.54092	0.07855
38.4196	41.1853	3.80347	0.09851
38.6149	41.4498	4.01557	0.000782731
38.9966	41.9039	4.05631	0.03966
39.3445	42.3555	4.10861	-0.00895
39.7313	42.7194	3.98719	-0.07804
40.0612	42.9161	3.89307	0.14147
40.504	43.318	3.80629	0.12742
40.6886	43.7756	3.52768	0.38121
41.0965	44.3267	3.10078	0.67049
41.5418	44.7536	2.66627	0.81915
41.9374	45.1025	2.26351	0.89316
42.0516	45.1799	1.59494	0.79506
42.0183	45.2198	1.14863	0.68643
42.0448	45.2257	0.77063	0.53189
42.0355	45.2558	0.62985	0.5168
41.9868	45.2848	0.37357	0.19579
42.0269	45.267	0.14618	-0.03945
42.0111	45.2681	0.06085	-0.37423
42.0339	45.2642	0.37135	-0.60101
42.0317	45.2624	0.92426	-0.78954
42.0158	45.238	1.47585	-0.97306
41.9876	45.1778	2.0252	-1.06086
42.0962	44.8065	2.3245	-1.13056
42.4439	44.6238	2.58214	-1.27205
42.8681	44.8269	2.99609	-1.20987
42.9494	44.6791	3.40442	-0.99287
42.8715	44.9946	3.73244	-0.90319
42.6058	45.682	3.96495	-0.47185
42.3116	46.3701	4.03087	-0.20692
42.1471	46.9223	4.05702	-0.05335
42.1209	47.2796	3.80032	-0.03773
41.9919	47.7764	3.57806	-0.0417
42.1094	47.9703	3.51508	-3.38979e-06
41.6777	48.367	3.58159	0.07133
41.1318	48.7996	3.57914	0.20824
40.9175	49.1456	3.48686	0.08162
40.7039	49.3978	3.26989	0.16497
40.577	49.6904	3.18264	0.11296
40.454	49.9495	3.26759	0.17892
40.1698	50.2648	3.14486	0.14442
40.0631	50.5324	3.00928	0.139
39.4833	50.8868	3.01239	0.16143
39.0335	51.2353	2.94003	0.04162
38.7313	51.6962	3.08639	0.06811
38.601	51.9337	3.22397	0.09028
38.5911	52.34	3.32302	0.20323
38.5834	52.4527	3.27001	0.28907
38.6276	52.7269	3.02756	0.23146
38.4706	53.1628	2.97389	0.12239
38.3418	53.419	2.79573	0.23599
37.8323	53.7767	2.54675	0.18825
37.7375	54.2974	2.39026	0.18263
37.7012	54.7805	2.45379	0.12394
37.7114	55.0748	2.54351	0.00784
37.7518	55.2363	2.50149	-0.14408
37.7749	55.5674	2.49965	-0.72628
37.8866	55.5666	2.50374	-0.82117
38.0904	55.571	2.4083	-1.30098
38.2686	56.0431	2.21737	-1.30621
38.2175	56.0737	2.10367	-1.38897
38.2288	56.4106	2.28449	-1.39644
38.2426	56.7181	2.59404	-1.45219
38.4366	57.3358	2.85998	-1.83943
38.5245	57.6554	3.03131	-2.02368
38.6207	58.0101	3.12202	-1.72622
38.7434	58.3586	3.12177	-1.45451
39.0012	58.7467	2.96866	-1.3046
38.9859	58.8339	2.92909	-1.20821
39.0047	59.1189	3.21288	-1.33781
39.1026	59.8411	3.18949	-1.23165
39.2799	60.3678	3.21216	-1.18801
39.4875	60.7946	3.12364	-1.08457
39.6183	61.009	3.241	-0.94856
39.8377	61.2536	3.32487	-0.7731
40.0731	61.4694	3.17608	-0.32378
40.0886	61.7229	3.15099	-0.0647
40.34	62.2258	3.21561	0.57053
40.898	62.5962	3.05451	0.68856
41.4306	62.7683	2.95245	0.81592
41.6614	62.6345	3.05905	0.71426
41.9159	62.6191	3.05125	0.562
42.2097	62.5805	2.98097	0.3947
42.6157	62.5736	2.85155	0.50935
42.9848	62.7692	2.65975	0.65184
43.1234	62.8429	2.55207	1.20395
43.6384	63.1176	2.22388	1.21347
44.0043	63.2739	2.18315	1.07579
44.3326	63.2462	2.36029	0.39026
44.5868	63.2275	2.51774	-0.22344
44.6857	63.1043	2.36291	-0.51762
44.7378	62.9329	2.27826	-0.61843
44.9165	62.7242	2.10113	-0.24202
45.1781	62.4678	1.98325	0.10844
45.405	62.5228	1.90589	0.12264
45.7053	62.2969	1.70295	0.31376
45.8534	62.2136	1.70773	0.42929
46.2939	62.0865	1.63196	0.35881
46.5539	61.9491	1.72857	0.17638
46.6092	61.9046	1.78689	-0.04079
46.6006	61.8939	1.71514	-0.02708
46.8226	61.7389	1.63024	0.281
46.8734	61.6911	1.5708	0.49309
47.0773	61.6295	1.51957	0.63257
47.3051	61.5842	1.42033	0.46637
47.5036	61.4765	1.37901	0.66645
47.6838	61.4662	1.18297	0.57112
47.9633	61.4877	1.11763	0.36707
48.2971	61.2616	1.14464	0.05071
48.3815	61.2362	1.05385	0.26549
48.3889	61.2054	0.88772	0.19407
48.4421	61.272	0.90347	0.49158
48.407	61.2685	0.78305	0.66617
48.4101	61.2632	0.6796	0.49962
48.4197	61.3298	0.61275	-0.03711
48.4258	61.3353	0.58444	-0.04353
48.4549	61.366	0.49489	0.08879
48.591	61.3545	0.53708	-0.26958
48.8883	61.3255	0.71818	-0.42507
48.9763	61.2684	0.75474	-0.41694
48.8803	61.2609	0.7291	-0.59112
48.971	61.1939	0.75059	-0.45555
48.9655	61.1988	0.71103	-0.6678
48.9629	61.1879	0.65611	-0.9389
48.8914	61.2529	0.5707	-0.87859
48.9634	61.211	0.23001	-0.99305
48.9469	61.178	0.28682	-1.08463
48.8126	61.2106	0.17547	-1.04475
48.8702	61.2323	0.34071	-0.93027
48.901	61.2214	0.50772	-0.79858
48.8768	61.1959	0.66778	-0.80074
48.9073	61.1272	0.91774	-0.5806
48.8816	61.1277	1.12046	-0.59061
48.8152	61.1344	1.38271	-0.49732
48.8194	61.107	1.65649	-0.48745
