# Supplementary material for: Crash landing of Vibrio cholerae by MSHA pili-assisted braking and anchoring in a viscoelastic environment
Source: eLife. 2021 Jul 2;10:e60655. doi: 10.7554/eLife.60655 (PMC8282333; doi:10.7554/eLife.60655)
Supplement: Figure 2—source data 2. [file elife-60655-fig2-data2.xlsx]

## Sheet: Figuew 2b
Elapsed time (s)	speed (μm/s)
0.129	1.52698
0.258	2.5209
0.387	3.27872
0.516	3.8256
0.645	4.18671
0.774	4.38722
0.903	4.45229
1.032	4.40711
1.161	4.27684
1.29	4.08664
1.419	3.86168
1.548	3.81325
1.677	3.72744
1.806	3.50798
1.935	3.67082
2.064	3.49154
2.193	3.67636
2.322	3.83262
2.451	4.01294
2.58	4.0854
2.709	4.05522
2.838	3.93381
2.967	3.74725
3.096	3.70099
3.225	3.57564
3.354	3.30898
3.483	3.03798
3.612	2.66543
3.741	2.19885
3.87	1.75632
3.999	1.46559
4.128	1.2687
4.257	1.04375
4.386	0.83369
4.515	0.86331
4.644	0.69211
4.773	0.74485
4.902	0.80444
5.031	0.87158
5.16	0.94404
5.289	0.95601
5.418	0.95359
5.547	0.85216
5.676	0.89325
5.805	0.87519
5.934	0.76434
6.063	0.85052
6.192	0.88766
6.321	0.86316
6.45	0.80101
6.579	0.7628
6.708	0.71164
6.837	0.7735
6.966	0.75579
7.095	0.55132
7.224	0.50894
7.353	0.2477
7.482	0.53347
7.611	0.92167
7.74	1.22354
7.869	1.58106
7.998	1.90863
8.127	2.18127
8.256	2.70518
8.385	2.99002
8.514	3.24376
8.643	3.66458
8.772	3.73601
8.901	3.80987
9.03	4.08638
9.159	4.35169
9.288	4.4475
9.417	4.26544
9.546	3.93622
9.675	3.41371
9.804	3.24053
9.933	2.9903
10.062	3.21428
10.191	3.34389
10.32	3.3553
10.449	3.27853
10.578	3.15352
10.707	3.16452
10.836	3.15056
10.965	2.91847
11.094	2.90717
11.223	2.93758
11.352	2.93172
11.481	3.14395
11.61	3.41995
11.739	3.55569
11.868	3.23207
11.997	3.09055
12.126	3.00939
12.255	3.04174
12.384	3.34665
12.513	3.51993
12.642	3.65683
12.771	3.6099
12.9	3.41066
13.029	3.15434
13.158	2.99525
13.287	2.78414
13.416	2.47843
13.545	2.33592
13.674	2.22477
13.803	2.1168
13.932	1.96265
14.061	1.71036
14.19	1.50756
14.319	1.34294
14.448	0.95842
14.577	0.78495
14.706	0.38521
14.835	0.66379
14.964	0.94995
15.093	1.18055
15.222	1.43061
15.351	1.51453
15.48	1.62896
15.609	1.88657
15.738	2.27427
15.867	2.66245
15.996	2.99805
16.125	3.38208
16.254	4.00227
16.383	4.19787
16.512	4.22406
16.641	4.22638
16.77	3.97006
16.899	3.78522
17.028	3.7846
17.157	4.32199
17.286	4.41054
17.415	4.14256
17.544	3.90082
17.673	3.70472
17.802	3.81781
17.931	3.91899
18.06	3.85554
18.189	3.67082
18.318	3.46108
18.447	3.50557
18.576	3.45308
18.705	3.81431
18.834	3.87643
18.963	4.0436
19.092	4.25144
19.221	4.46522
19.35	4.57528
19.479	4.70099
19.608	4.92997
19.737	4.88549
19.866	4.83426
19.995	4.78232
20.124	4.88076
20.253	4.857
20.382	4.81473
20.511	4.30001
20.64	3.85738
20.769	3.64438
20.898	3.48623
21.027	3.47648
21.156	3.26417
21.285	3.20992
21.414	3.00255
21.543	3.07324
21.672	3.20006
21.801	3.29242
21.93	3.31177
22.059	3.24932
22.188	3.44605
22.317	3.38252
22.446	3.60424
22.575	3.72361
22.704	3.72263
22.833	3.57177
22.962	3.55286
23.091	3.35953
23.22	3.47429
23.349	3.56802
23.478	3.83258
23.607	4.04631
23.736	4.08735
23.865	4.14006
23.994	4.0177
24.123	3.92286
24.252	3.83542
24.381	3.55468
24.51	3.12451
24.639	2.68668
24.768	2.28084
24.897	1.60715
25.026	1.15742
25.155	0.77653
25.284	0.63467
25.413	0.37643
25.542	0.1473
25.671	0.06131
25.8	0.37419
25.929	0.93133
26.058	1.48714
26.187	2.0407
26.316	2.34229
26.445	2.6019
26.574	3.01902
26.703	3.43048
26.832	3.761
26.961	3.99529
27.09	4.06172
27.219	4.08807
27.348	3.8294
27.477	3.60545
27.606	3.54199
27.735	3.60901
27.864	3.60653
27.993	3.51355
28.122	3.29492
28.251	3.207
28.38	3.2926
28.509	3.16893
28.638	3.03231
28.767	3.03545
28.896	2.96253
29.025	3.11001
29.154	3.24865
29.283	3.34845
29.412	3.29504
29.541	3.05073
29.67	2.99665
29.799	2.81712
29.928	2.56624
30.057	2.40855
30.186	2.47257
30.315	2.56298
30.444	2.52063
30.573	2.51878
30.702	2.52291
30.831	2.42673
30.96	2.23434
31.089	2.11977
31.218	2.30197
31.347	2.61389
31.476	2.88187
31.605	3.05452
31.734	3.14591
31.863	3.14566
31.992	2.99138
32.121	2.95151
32.25	3.23747
32.379	3.2139
32.508	3.23674
32.637	3.14754
32.766	3.2658
32.895	3.35031
33.024	3.20039
33.153	3.1751
33.282	3.24022
33.411	3.07789
33.54	2.97505
33.669	3.08246
33.798	3.07461
33.927	3.00379
34.056	2.87338
34.185	2.6801
34.314	2.57161
34.443	2.2409
34.572	2.19986
34.701	2.37836
34.83	2.53701
34.959	2.381
35.088	2.2957
35.217	2.11721
35.346	1.99843
35.475	1.92048
35.604	1.71598
35.733	1.7208
35.862	1.64445
35.991	1.7418
36.12	1.80057
36.249	1.72827
36.378	1.64271
36.507	1.58282
36.636	1.5312
36.765	1.4312
36.894	1.38957
37.023	1.19202
37.152	1.12619
37.281	1.1534
37.41	1.06192
37.539	0.89451
37.668	0.91039
37.797	0.78904
37.926	0.68481
38.055	0.61744
38.184	0.58891
38.313	0.49868
38.442	0.54119
38.571	0.72368
38.7	0.76051
38.829	0.73468
38.958	0.75633
39.087	0.71647
39.216	0.66113
39.345	0.57506
39.474	0.23177
39.603	0.28902
39.732	0.17681
39.861	0.34332
39.99	0.51161
40.119	0.67289
40.248	0.92476
40.377	1.12904
40.506	1.39329
40.635	1.66917
40.764	2.00052
40.893	2.17528
41.022	2.39202
41.151	2.63226
41.28	2.79601
41.409	2.85599
41.538	2.82845
41.667	2.56598
41.796	2.3704
41.925	2.05733
42.054	1.79209
42.183	1.79627
42.312	1.53474
42.441	1.48968
42.57	1.33404
42.699	1.17901
42.828	1.13735
42.957	1.14559
43.086	1.26166
43.215	1.32095
43.344	1.29677
43.473	1.41564
43.602	1.56917
43.731	1.78203
43.86	1.90343
43.989	1.92698
44.118	1.85193
44.247	1.48326
44.376	1.6514
44.505	1.78852
44.634	1.95475
44.763	1.89403
44.892	1.95824
45.021	1.92852
45.15	1.83586
45.279	1.77788
45.408	1.62184
45.537	1.5253
45.666	1.52019
45.795	1.37142
45.924	1.19592
46.053	1.18822
46.182	1.13089
46.311	1.18949
46.44	1.22337
46.569	1.18993
46.698	1.09844
46.827	1.02128
46.956	1.33626
47.085	1.36213
47.214	1.39608
47.343	1.32667
47.472	1.37022
47.601	1.32523
47.73	1.23601
47.859	1.11753
47.988	0.93168
48.117	0.86942
48.246	0.78585
48.375	0.56528
48.504	0.45607
48.633	0.36619
48.762	0.43576
48.891	0.44798
49.02	0.49255
49.149	0.35755
49.278	0.42457
49.407	0.46241
49.536	0.49548
49.665	0.51633
49.794	0.63614
49.923	0.64547
50.052	0.67182
50.181	0.71545
50.31	0.73956
50.439	0.73086
50.568	0.66566
50.697	0.63021
50.826	0.59218
50.955	0.55482
51.084	0.52814
51.213	0.43415
51.342	0.38413
51.471	0.27601
51.6	0.2034
51.729	0.05293
51.858	0.15583
51.987	0.21552
52.116	0.30912
52.245	0.4259
52.374	0.51672
52.503	0.59139
52.632	0.6518
52.761	0.68122
52.89	0.71124
53.019	0.70272
53.148	0.70988
53.277	0.73528
53.406	0.72712
53.535	0.59383
53.664	0.511
53.793	0.52038
53.922	0.52499
54.051	0.49656
54.18	0.53958
54.309	0.63729
54.438	0.76313
54.567	0.9162
54.696	0.99873
54.825	1.05466
54.954	1.04599
55.083	1.04107
55.212	0.99631
55.341	0.94816
55.47	0.87753
55.599	0.7638
55.728	0.66699
55.857	0.48148
55.986	0.29795
56.115	0.15472
56.244	0.15021
56.373	0.19149
56.502	0.20335
56.631	0.24848
56.76	0.32909
56.889	0.39014
57.018	0.38956
57.147	0.39617
57.276	0.3963
57.405	0.34523
57.534	0.34545
57.663	0.31411
57.792	0.29225
57.921	0.29476
58.05	0.29325
58.179	0.26421
58.308	0.27616
58.437	0.27495
58.566	0.2928
58.695	0.30969
58.824	0.23488
58.953	0.31757
59.082	0.39244
59.211	0.49967
59.34	0.6165
59.469	0.74729
59.598	0.8949
59.727	1.01624
59.856	1.19657
59.985	1.34593
60.114	1.57082
60.243	1.77512
60.372	1.99529
60.501	2.12895
60.63	2.28903
60.759	2.43849
60.888	2.49598
61.017	2.5073
61.146	2.43464
61.275	2.37127
61.404	2.30238
61.533	2.33536
61.662	2.27333
61.791	2.2292
61.92	2.22385
62.049	2.21227
62.178	2.24936
62.307	2.23222
62.436	2.23984
62.565	2.28318
62.694	2.31699
62.823	2.28466
62.952	2.2937
63.081	2.27737
63.21	2.31313
63.339	2.24287
63.468	2.03634
63.597	1.9112
63.726	1.63551
63.855	1.48753
63.984	1.25953
64.113	1.06555
64.242	0.9282
64.371	0.78185
64.5	0.78658
64.629	0.80453
64.758	0.88174
64.887	0.98099
65.016	1.131
65.145	1.30293
65.274	1.44675
65.403	1.76605
65.532	1.98571
65.661	2.09632
65.79	2.15433
65.919	2.29409
66.048	2.36197
66.177	2.42708
66.306	2.35996
66.435	2.32017
66.564	2.07092
66.693	1.89959
66.822	1.70225
66.951	1.51545
67.08	1.39523
67.209	1.24741
67.338	1.18702
67.467	1.20994
67.596	1.27896
67.725	1.32628
67.854	1.35075
67.983	1.48078
68.112	1.52023
68.241	1.66852
68.37	1.92968
68.499	2.16169
68.628	2.37374
68.757	2.50632
68.886	2.57495
69.015	2.65114
69.144	2.64772
69.273	2.67802
69.402	2.68709
69.531	2.66259
69.66	2.63181
69.789	2.67173
69.918	2.69679
70.047	2.70803
70.176	2.61523
70.305	2.40046
70.434	2.14139
70.563	2.03665
70.692	1.92446
70.821	1.7252
70.95	1.50348
71.079	1.28451
71.208	1.14503
71.337	0.93919
71.466	0.75943
71.595	0.72081
71.724	0.62119
71.853	0.51841
71.982	0.49722
72.111	0.47919
72.24	0.56274
72.369	0.64998
72.498	0.70142
72.627	0.67838
72.756	0.67974
72.885	0.69253
73.014	0.76913
73.143	0.90811
73.272	1.05435
73.401	1.14276
73.53	1.19359
73.659	1.34483
73.788	1.47154
73.917	1.53618
74.046	1.56672
74.175	1.74272
74.304	1.78562
74.433	1.75703
74.562	1.74531
74.691	1.66845
74.82	1.58485
74.949	1.44571
75.078	1.26909
75.207	1.02531
75.336	0.8668
75.465	0.67723
75.594	0.54036
75.723	0.41782
75.852	0.30008
75.981	0.17207
76.11	0.07893
76.239	0.07695
76.368	0.06612
76.497	0.02923
76.626	0.04122
76.755	0.13045
76.884	0.14405
77.013	0.1531
77.142	0.17373
77.271	0.17661
77.4	0.18786
77.529	0.18946
77.658	0.18259
77.787	0.18126
77.916	0.17557
78.045	0.17857
78.174	0.17945
78.303	0.1831
78.432	0.11858
78.561	0.13587
78.69	0.06813
78.819	0.10151
78.948	0.16745
79.077	0.2242
79.206	0.2337
79.335	0.28809
79.464	0.34708
79.593	0.33176
79.722	0.4687
79.851	0.59284
79.98	0.69544
80.109	0.66785
80.238	0.72235
80.367	0.77652
80.496	0.90253
80.625	0.94933
80.754	1.0215
80.883	1.04371
81.012	0.99377
81.141	1.04761
81.27	0.99119
81.399	1.04604
81.528	1.04775
81.657	0.96903
81.786	0.88414
81.915	0.81091
82.044	0.69711
82.173	0.63149
82.302	0.66466
82.431	0.62338
82.56	0.48318
82.689	0.35894
82.818	0.41075
82.947	0.39305
83.076	0.46501
83.205	0.48192
83.334	0.50553
83.463	0.52815
83.592	0.54783
83.721	0.68339
83.85	0.77804
83.979	0.87672
84.108	0.97997
84.237	1.05004
84.366	1.17632
84.495	1.20963
84.624	1.27465
84.753	1.32554
84.882	1.3923
85.011	1.44597
85.14	1.38337
85.269	1.35153
85.398	1.32751
85.527	1.22672
85.656	1.12604
85.785	1.02752
85.914	0.93746
86.043	0.86536
86.172	0.84496
86.301	0.88368
86.43	0.89193
86.559	0.86154
86.688	0.94161
86.817	0.98866
86.946	1.02375
87.075	1.02012
87.204	1.12625
87.333	1.12871
87.462	1.20182
87.591	1.22289
87.72	1.22838
87.849	1.28987
87.978	1.37766
88.107	1.4141
88.236	1.47457
88.365	1.50615
88.494	1.52869
88.623	1.48789
88.752	1.61104
88.881	1.69393
89.01	1.67464
89.139	1.53006
89.268	1.51309
89.397	1.51162
89.526	1.42202
89.655	1.37884
89.784	1.3695
89.913	1.25944
90.042	1.20238
90.171	1.23033
90.3	1.23907
90.429	1.29296
90.558	1.34396
90.687	1.39364
90.816	1.40466
90.945	1.36997
91.074	1.38831
91.203	1.49308
91.332	1.58947
91.461	1.56735
91.59	1.42028
91.719	1.31451
91.848	1.31679
91.977	1.26952
92.106	1.11941
92.235	1.03027
92.364	0.92092
92.493	0.75576
92.622	0.62962
92.751	0.57087
92.88	0.45216
93.009	0.37621
93.138	0.30995
93.267	0.2704
93.396	0.21519
93.525	0.2048
93.654	0.22207
93.783	0.29845
93.912	0.28568
94.041	0.29317
94.17	0.28346
94.299	0.30108
94.428	0.2872
94.557	0.26577
94.686	0.25888
94.815	0.22727
94.944	0.19678
95.073	0.16704
95.202	0.18753
95.331	0.18793
95.46	0.16655
95.589	0.16834
95.718	0.16511
95.847	0.17456
95.976	0.18519
96.105	0.19685
96.234	0.2087
96.363	0.21989
96.492	0.22956
96.621	0.23684
96.75	0.2409
96.879	0.24087
97.008	0.23591
97.137	0.22514
97.266
97.395
97.524
97.653
97.782
97.911
98.04
98.169
98.298
98.427
98.556
98.685
98.814
98.943
99.072
99.201
99.33
99.459
99.588
99.717
99.846
99.975
100.104
100.233
100.362
100.491
100.62
100.749
100.878
101.007
101.136
101.265
101.394
101.523
101.652
101.781
101.91
102.039
102.168
102.297
102.426
102.555
102.684
102.813
102.942
103.071
103.2
103.329
103.458
103.587
103.716
103.845
103.974
104.103
104.232
104.361
104.49
104.619
104.748
104.877
105.006
105.135
105.264
105.393
105.522
105.651
105.78
105.909
106.038
106.167
106.296
106.425
106.554
106.683
106.812
106.941
107.07
107.199
107.328
107.457
107.586
107.715
107.844
107.973
108.102
108.231
108.36
108.489
108.618
108.747
108.876
109.005
109.134
109.263
109.392
109.521
109.65
109.779
109.908
110.037
110.166
110.295
110.424
110.553
110.682
110.811
110.94
111.069
111.198
111.327
111.456
111.585
111.714
