# Supplementary material for: Crash landing of Vibrio cholerae by MSHA pili-assisted braking and anchoring in a viscoelastic environment
Source: eLife. 2021 Jul 2;10:e60655. doi: 10.7554/eLife.60655 (PMC8282333; doi:10.7554/eLife.60655)
Supplement: Figure 2—source data 3. [file elife-60655-fig2-data3.xlsx]

## Sheet: Figure 2c
x axis	y axis	z axis	color map
x position (μm)	y position (μm)	speed (μm/s)	angle (rad)
17.9887	31.5376	11.4432	1.56712
18.6172	32.7588	9.02181	1.3707
19.2377	33.6502	7.10126	1.22476
19.8461	34.4796	5.63103	1.12406
20.0366	35.309	4.56063	1.06332
20.2856	36.2461	3.83956	1.03728
20.7405	36.5253	3.41731	1.04068
20.8576	36.7333	3.24338	1.06825
20.9029	36.8713	3.26727	1.11474
20.9052	36.9756	3.43847	1.17488
20.8643	37.5057	3.70649	1.24341
20.3267	38.084	3.71317	1.32828
20.1913	38.3327	3.56278	1.52852
19.9458	38.9764	3.4005	1.28965
19.517	39.6913	3.72361	1.47958
19.2734	40.3527	4.05043	1.25709
19.3576	40.7467	4.3351	1.40572
19.5933	40.9795	4.33891	1.62391
19.8675	41.5833	4.03476	1.98759
20.3778	42.1056	3.54346	2.02232
20.4454	42.0867	3.12219	2.49121
20.5122	42.0498	3.1702	2.05982
20.8566	41.9916	2.86483	1.98813
21.497	41.9598	2.74767	1.97309
22.4777	41.7901	2.59917	2.22359
22.6204	41.6754	2.56989	1.90119
22.7411	41.2934	2.77918	1.96095
22.6898	41.2467	2.74017	1.96735
22.628	41.2919	2.77573	1.89442
22.6453	40.9872	2.81726	1.32725
22.4925	40.6057	2.75975	1.03908
22.4488	39.9104	2.81032	0.81943
22.2437	39.9472	2.86392	0.56159
21.9557	39.9975	3.04438	0.25421
21.7056	39.7836	3.50716	0.12132
20.9588	39.8166	3.71425	0.04203
20.2604	40.0129	4.15584	0.13857
20.2761	40.063	4.27056	0.18917
20.4382	40.3218	4.21617	-0.01448
20.2268	40.8527	4.10329	-0.14932
19.8659	41.723	3.77998	-0.03334
19.7432	42.3512	3.66926	-0.34895
20.0302	42.4609	3.14971	-0.33744
20.1409	42.8819	2.85593	-0.2433
20.3567	43.385	2.62399	0.0063
20.6576	43.963	2.84049	0.03152
20.8821	44.3254	3.17643	0.12524
20.896	44.2552	3.22456	0.01832
20.957	44.2175	3.14128	-0.08509
20.9094	44.2131	3.08404	0.00327
20.9767	44.1195	3.42436	0.04452
21.4934	43.9973	3.83996	0.02564
22.0533	43.9119	3.96483	0.07416
22.993	43.5628	3.87405	0.09269
23.6616	43.1095	3.95429	0.22305
24.3546	42.6708	3.99874	0.26367
24.7414	42.2783	4.14991	0.32973
24.8245	41.8472	4.14226	0.22853
24.934	41.7332	4.02103	0.10213
25.0167	41.3257	3.60829	0.30693
24.9903	40.6906	3.1991	0.21798
24.8236	40.2671	3.27857	0.30215
24.8785	40.2044	3.24155	0.23284
24.7633	40.2689	3.42869	0.21588
24.1828	40.1908	3.59048	0.09186
23.7346	40.0751	3.78808	-0.06278
23.0365	39.6714	3.5507	-0.29453
22.4991	39.5418	3.6054	-0.53078
22.123	39.6956	3.47732	-0.51049
21.7619	39.8672	3.36866	-0.51013
21.034	40.0282	3.33957	-0.64054
20.3892	40.323	3.09957	-0.77101
20.4765	40.3483	2.54178	-0.72365
20.4856	40.5155	1.94423	-0.83665
20.6721	40.5566	1.79821	-0.88546
20.7003	40.659	1.67985	-0.9098
20.7506	40.7247	1.84848	-0.80311
20.484	41.4111	2.02711	-0.72669
20.4369	41.5824	2.11821	-0.85008
20.4907	41.5752	2.00892	-0.76896
20.5719	41.6085	2.17735	-0.54177
20.6431	41.7031	2.47794	-0.27956
20.6721	42.0642	2.66865	-0.11355
20.6934	42.6541	2.86515	0.07961
20.8148	43.3766	2.89796	0.13896
20.9775	43.8157	2.75179	0.18077
21.1296	44.166	2.9627	0.19677
21.4297	44.0492	3.42622	0.35431
21.5724	44.0258	3.43827	0.40115
21.6893	44.0732	3.19662	0.31134
22.1875	44.1882	3.21673	0.18682
22.7661	44.2002	3.26602	0.17092
23.388	44.0896	3.20067	0.09239
23.4008	43.7668	3.24517	0.00896
23.3943	43.4827	3.60356	-0.10465
23.7303	43.0224	3.93497	-0.16184
24.0961	42.217	4.33101	-0.1337
24.034	42.0838	4.52806	-0.31239
23.7614	42.0573	4.49522	-0.52076
23.5359	41.5142	4.34901	-0.27362
23.055	40.6708	4.25887	-0.40228
22.7237	40.2785	4.20394	-0.46697
22.4472	40.4127	4.03587	-0.30338
21.8098	40.2379	3.72608	-0.21802
21.0303	39.9948	3.3859	-0.08399
20.4494	39.9723	3.01722	0.05107
20.0353	40.1037	2.95734	0.15562
20.055	40.2132	2.49425	0.16468
19.9282	40.3783	1.98811	0.14432
19.7338	40.4739	1.61158	0.1707
19.8349	40.4914	1.50054	-0.09614
19.9534	40.3747	1.2234	-0.11799
19.9522	40.3134	0.83544	-0.2255
19.8635	40.5843	0.66228	-0.52816
19.822	40.7615	0.68614	-0.58354
19.8263	40.7714	0.69801	-0.74565
20.064	40.8351	0.71044	-0.84937
20.1362	40.8753	0.55579	-1.22362
20.1422	40.8905	0.46218	-1.26966
20.163	40.8842	0.40583	-1.43733
20.1821	40.8697	0.29057	-1.44855
20.1357	40.8822	0.18421	-1.31023
20.1585	40.8892	0.06011	-0.90974
20.1664	40.8842	0.12698	-0.81871
20.1435	40.8822	0.16085	-0.7766
20.1638	40.8762	0.12499	-0.45437
20.1596	40.8912	0.23356	-0.4313
20.1633	40.8989	0.24122	-0.24366
20.1484	40.8648	0.26611	0.20639
20.1612	40.8995	0.28384	0.2406
20.1589	40.881	0.29049	0.37687
20.1863	40.8648	0.3167	0.56727
20.0754	40.8999	0.33986	0.46944
20.1597	40.8922	0.35453	0.45784
20.1476	40.896	0.37421	0.34791
20.1605	40.8549	0.38955	0.25178
20.1642	40.8669	0.41003	0.05999
20.163	40.8507	0.42741	-0.00307
20.0563	40.8577	0.47629	0.10488
20.0858	40.8415	0.50716	-0.04712
20.0407	40.852	0.49836	0.05622
20.1098	40.8308	0.47852	-0.41793
20.1111	40.9077	0.52015	-0.53184
20.0441	40.9344	0.541	-0.80603
20.1046	40.8904	0.51771	-0.96315
20.0699	40.8177	0.48878	-0.55083
20.1511	40.8604	0.43237	-0.49215
20.0749	40.8547	0.37694	-0.03674
20.1345	40.8697	0.36858	0.09791
20.1406	40.8735	0.31183	0.22111
20.1438	40.88	0.26721	0.28365
20.159	40.9061	0.23834	0.26844
20.1469	40.8683	0.21034	0.08025
20.1385	40.8647	0.18114	0.26875
20.117	40.8655	0.1521	-0.10581
20.1235	40.8518	0.13102	0.12459
20.1522	40.8737	0.13332	-0.09445
20.1388	40.9131	0.15361	0.07813
20.1557	40.9042	0.1743	0.06578
20.1376	40.9044	0.16831	-0.20968
20.1597	40.8777	0.16226	-0.39792
20.147	40.884	0.16359	-0.71515
20.1509	40.8844	0.16896	-0.47159
20.1447	40.8801	0.16201	-0.35163
20.1545	40.8801	0.15081	-0.37932
20.1435	40.8596	0.13497	0.03208
20.1672	40.8873	0.13177	-0.02894
20.1362	40.8679	0.12316	0.12036
20.1433	40.883	0.12313	-0.18891
20.1634	40.8834	0.11973	-0.18618
20.145	40.8832	0.13642	-0.21262
20.1406	40.8893	0.13285	-0.32702
20.134	40.8823	0.12675	-0.4067
20.148	40.8786	0.13479	-0.16214
20.1501	40.8803	0.13703	-0.39348
20.1343	40.8825	0.14989	-0.12024
20.1499	40.8797	0.16537	-0.2739
20.1418	40.8934	0.18551	-0.08266
20.1886	40.8904	0.18673	-0.1228
20.17	40.8779	0.19501	-0.56489
20.1446	40.8599	0.19754	-0.61751
20.1622	40.858	0.19455	-0.62933
20.1449	40.8206	0.19056	-0.40878
20.1514	40.8606	0.18249	-0.64777
20.1658	40.8597	0.15843	-0.55957
20.1506	40.8699	0.14171	-0.36072
20.1551	40.867	0.12168	-0.56568
20.1521	40.8784	0.09125	-0.52438
20.1579	40.8768	0.0867	-0.47421
20.1789	40.8761	0.09105	-0.08167
20.1749	40.8669	0.09733	-0.03974
20.1588	40.8703	0.07449	0.35518
20.1572	40.88	0.10322	0.42555
20.1582	40.8714	0.119	0.61345
20.1676	40.8879	0.14362	0.72714
20.1678	40.9015	0.16438	0.73328
20.1619	40.8862	0.18526	0.69019
20.1319	40.8638	0.19409	0.52318
20.1451	40.8972	0.20784	0.4836
20.1471	40.8953	0.20895	0.46064
20.1491	40.8901	0.21336	0.35361
20.1203	40.85	0.20578	0.48076
20.1621	40.8936	0.20294	0.34012
20.1476	40.8709	0.20985	0.71615
20.1781	40.8845	0.21654	0.71248
20.1556	40.8756	0.21672	0.48365
20.1574	40.8892	0.21832	0.62387
20.1499	40.8819	0.22823	0.71943
20.1322	40.8788	0.21948	0.45692
20.1518	40.8814	0.19358	0.1584
20.126	40.8644	0.15914	0.44816
20.13	40.8327	0.1656	0.53422
20.1453	40.883	0.18782	0.21463
20.1212	40.85	0.21227	0.36103
20.1412	40.8503	0.23585	0.16673
20.1581	40.8642	0.24722	0.41015
20.1391	40.8568	0.25592	0.2299
20.1403	40.8656	0.25486	0.04817
20.1389	40.8714	0.25641	0.10408
20.1409	40.8291	0.2591	-0.16136
20.0976	40.842	0.25338	0.08312
20.161	40.8279	0.26893	0.32454
20.1469	40.8721	0.28423	0.31174
20.1407	40.8236	0.28362	0.3428
20.1337	40.8425	0.28386	0.36581
20.1091	40.8486	0.2924	0.19741
20.1266	40.8137	0.28509	0.23488
20.1147	40.8418	0.2779	0.288
20.1311	40.8082	0.25427	0.48602
20.1005	40.8217	0.24607	0.59662
20.0889	40.7995	0.24452	0.84241
20.1351	40.8178	0.2658	0.71841
20.1318	40.827	0.2736	0.57547
20.1198	40.8534	0.28285	0.76268
20.1332	40.7967	0.27892	0.54535
20.1384	40.8401	0.26359	0.48871
20.1178	40.8257	0.25291	0.12352
20.0996	40.7824	0.24326	0.20076
20.0791	40.7991	0.2437	0.37061
20.1142	40.7855	0.28666	0.34087
20.0812	40.7608	0.29649	0.48661
20.1126	40.7781	0.32687	0.44182
20.1179	40.7966	0.32257	0.18569
20.0923	40.8112	0.33148	0.12948
20.1161	40.837	0.34199	0.24967
20.1046	40.809	0.34298	-0.07036
20.0674	40.769	0.34869	-0.07595
20.0453	40.7007	0.35724	-0.04034
20.1236	40.7082	0.33541	0.20832
20.1112	40.7927	0.33195	0.03058
20.1077	40.7961	0.34203	0.01682
20.0997	40.8382	0.37917	0.02044
20.1257	40.8333	0.35563	0.11456
20.0865	40.8214	0.37408	0.15727
20.1064	40.8302	0.38095	-0.14159
20.1364	40.8655	0.37594	0.02991
20.0966	40.8209	0.36777	0.09811
20.0658	40.8298	0.35613	0.49084
20.0554	40.786	0.37374	0.7347
20.1375	40.8188	0.41439	0.95073
20.0658	40.8542	0.40332	0.96986
20.0866	40.7876	0.41558	0.98697
20.0826	40.7945	0.40292	0.58004
20.1688	40.8275	0.37515	0.562
20.1678	40.8461	0.34256	0.14154
20.1689	40.8222	0.31982	0.04432
20.1526	40.8343	0.31091	-0.09365
20.1625	40.7967	0.27761	-0.17959
20.1075	40.8459	0.25305	-0.0594
20.1399	40.8107	0.24194	-0.01225
20.1559	40.79	0.23377	-0.13574
20.1553	40.8219	0.23633	0.19115
20.1617	40.8247	0.20612	0.34599
20.1481	40.8155	0.21814	0.3536
20.124	40.8583	0.18195	0.17283
20.1345	40.8278	0.1742	0.51863
20.1602	40.8415	0.16364	0.35762
20.1544	40.8301	0.16276	0.79045
20.1366	40.8207	0.17305	0.87492
20.1329	40.8191	0.20307	0.66792
20.1588	40.8255	0.22001	0.20421
20.1524	40.7918	0.24695	0.23213
20.15	40.8148	0.25267	-0.08726
20.1586	40.832	0.26027	-0.13572
20.1933	40.8412	0.28643	-0.50296
20.1203	40.8331	0.31014	-0.33342
20.1399	40.8044	0.32338	-0.75183
20.1284	40.7736	0.32087	-0.71192
20.1537	40.7513	0.3087	-0.80117
20.146	40.8208	0.28642	-0.46918
20.1351	40.8505	0.27024	-0.54288
20.125	40.8136	0.25514	-0.10439
20.1416	40.7942	0.23649	-0.15092
20.1436	40.8259	0.21091	-0.01084
20.1669	40.8398	0.17501	-0.12838
20.1459	40.8294	0.17739	0.14063
20.1536	40.8294	0.1647	0.02716
20.144	40.8186	0.14566	0.37533
20.1355	40.8311	0.1169	0.28569
20.1437	40.8022	0.12398	0.01396
20.1635	40.8103	0.12937	-0.05787
20.1476	40.8245	0.1381	-0.05183
20.166	40.8111	0.13625	-0.2274
20.1579	40.8037	0.14679	-0.40606
20.1611	40.8082	0.15595	-0.46619
20.1251	40.8073	0.19081	-0.58817
20.1356	40.8197	0.2023	-0.65887
20.139	40.8308	0.22134	-0.68615
20.1551	40.8171	0.23959	-0.84822
20.1878	40.7819	0.25795	-0.50864
20.146	40.7753	0.27127	-0.69039
20.1582	40.796	0.28557	-0.47857
20.1283	40.7837	0.31797	-0.6513
20.1534	40.8281	0.32535	-0.62093
20.107	40.845	0.31536	-0.53171
20.1642	40.817	0.32029	-0.08598
20.1461	40.8073	0.32393	0.00789
20.174	40.774	0.30702	0.01335
20.1532	40.7994	0.28391	0.06569
20.1254	40.7928	0.28058	0.06792
20.1645	40.8085	0.2767	0.0647
20.126	40.7823	0.26578	0.1205
20.1668	40.8049	0.25082	0.40421
20.1604	40.8097	0.25248	0.50878
20.1701	40.7855	0.24272	0.43008
20.1353	40.8044	0.24309	0.11341
20.1742	40.7983	0.2011	0.23673
20.1648	40.8084	0.19513	0.22378
20.1542	40.7805	0.18877	0.09118
20.1537	40.8216	0.18065	0.26765
20.1838	40.8324	0.20269	-0.07245
20.1679	40.8081	0.22662	0.06356
20.1706	40.8243	0.24998	-0.02159
20.1908	40.831	0.25389	-0.31682
20.1941	40.8295	0.26062	-0.25598
20.1753	40.8187	0.25948	0.01511
20.1662	40.7933	0.2809	-0.10422
20.0926	40.8114	0.27666	-0.31799
20.134	40.7847	0.26939	0.0115
20.0839	40.7926	0.27988	0.16081
20.1426	40.7867	0.28003	0.06764
20.1267	40.7706	0.29019	0.05954
20.1446	40.7869	0.28582	0.07679
20.1735	40.782	0.28928	-0.29483
20.17	40.762	0.26866	-0.69601
20.1581	40.7447	0.24909	-0.72439
20.2039	40.7223	0.21752	-0.48686
20.2116	40.7343	0.22016	-0.547
20.2125	40.7069	0.20125	-0.75915
20.2587	40.7129	0.19588	-0.48284
20.2817	40.6927	0.17598	-0.46826
20.3259	40.688	0.16745	-0.34468
20.307	40.7016	0.17747	-0.03675
20.3351	40.694	0.19317	0.00912
20.3299	40.6906	0.17032	0.21407
20.3193	40.6888	0.11804	0.31358
20.3134	40.6912	0.15875	0.2959
20.3272	40.7069	0.20414	0.2743
20.3292	40.6964	0.24415	0.66925
20.3248	40.6606	0.29312	0.8551
20.3241	40.6859	0.3613	0.64169
20.3098	40.7711	0.4404	0.2392
20.3095	40.7149	0.4915	0.0698
20.3263	40.6929	0.55311	-0.01425
20.3439	40.688	0.56408	0.00739
20.3328	40.7739	0.61155	-0.11305
20.302	40.5944	0.61459	-0.22823
20.2721	40.6793	0.61959	-0.41557
20.2198	40.6959	0.6059	-0.22643
20.2481	40.7678	0.5842	0.24669
20.32	40.7056	0.52481	0.36851
20.2972	40.7522	0.5062	0.6641
20.2982	40.7135	0.46145	1.22458
20.3021	40.6533	0.38628	1.39364
20.3348	40.6624	0.2867	1.22062
20.3118	40.7498	0.21984	1.29181
20.3098	40.7456	0.22594	1.30465
20.3217	40.7047	0.2083	1.37527
20.3263	40.6831	0.15726	1.44049
20.3274	40.6773	0.14066	1.18282
20.3241	40.6827	0.15861	0.80988
20.3187	40.6483	0.16584	0.74348
20.3144	40.6544	0.16575	0.75249
20.3178	40.6676	0.18907	0.5131
20.3375	40.6639	0.19295	0.08996
20.3074	40.6633	0.236	-0.11692
20.3375	40.6761	0.22795	-0.36551
20.316	40.6519	0.24329	-0.23746
20.3276	40.6696	0.24348	-0.24622
20.3402	40.7332	0.23701	-0.0298
20.3195	40.6893	0.21876	-0.23197
20.2922	40.7015	0.21281	-0.1053
20.3113	40.6919	0.16604	0.09502
20.3344	40.6953	0.15054	0.00185
20.3335	40.6913	0.134	-0.18217
20.3217	40.6907	0.12816	0.05535
20.3268	40.6952	0.12668	-0.08913
20.3113	40.6852	0.11669	0.06892
20.3218	40.6852	0.0865	0.29783
20.3074	40.6961	0.11868	0.36959
20.3119	40.6979	0.14231	0.62655
20.3054	40.6871	0.16809	0.87778
20.2922	40.6816	0.19448	1.10658
20.3361	40.735	0.21997	1.29628
20.3266	40.7134	0.24305	1.43018
20.3146	40.6871	0.2622	1.49161
20.3096	40.706	0.2759	1.46387
20.3077	40.6922	0.28263	1.33028
20.3155	40.6607	0.28087	1.07416
20.3335	40.7304	0.26912	0.67883
