# Supplementary material for: Crash landing of Vibrio cholerae by MSHA pili-assisted braking and anchoring in a viscoelastic environment
Source: eLife. 2021 Jul 2;10:e60655. doi: 10.7554/eLife.60655 (PMC8282333; doi:10.7554/eLife.60655)
Supplement: Figure 2—source data 4. [file elife-60655-fig2-data4.xlsx]

## Sheet: Figure 2d
Elapsed time (s)	speed (μm/s)
0.129	11.5308
0.258	9.09086
0.387	7.15561
0.516	5.67413
0.645	4.59554
0.774	3.86894
0.903	3.44346
1.032	3.2682
1.161	3.29227
1.29	3.46479
1.419	3.73486
1.548	3.74159
1.677	3.59004
1.806	3.42653
1.935	3.75211
2.064	4.08143
2.193	4.36828
2.322	4.37211
2.451	4.06564
2.58	3.57058
2.709	3.14608
2.838	3.19447
2.967	2.88676
3.096	2.7687
3.225	2.61907
3.354	2.58955
3.483	2.80045
3.612	2.76114
3.741	2.79697
3.87	2.83882
3.999	2.78087
4.128	2.83183
4.257	2.88584
4.386	3.06768
4.515	3.534
4.644	3.74267
4.773	4.18765
4.902	4.30324
5.031	4.24844
5.16	4.13469
5.289	3.80891
5.418	3.69734
5.547	3.17382
5.676	2.87779
5.805	2.64407
5.934	2.86223
6.063	3.20074
6.192	3.24924
6.321	3.16532
6.45	3.10764
6.579	3.45057
6.708	3.86935
6.837	3.99518
6.966	3.9037
7.095	3.98455
7.224	4.02934
7.353	4.18167
7.482	4.17397
7.611	4.05181
7.74	3.63591
7.869	3.22358
7.998	3.30366
8.127	3.26636
8.256	3.45494
8.385	3.61796
8.514	3.81707
8.643	3.57787
8.772	3.633
8.901	3.50393
9.03	3.39445
9.159	3.36513
9.288	3.12329
9.417	2.56124
9.546	1.95911
9.675	1.81197
9.804	1.69271
9.933	1.86262
10.062	2.04262
10.191	2.13442
10.32	2.02429
10.449	2.19402
10.578	2.49691
10.707	2.68907
10.836	2.88707
10.965	2.92014
11.094	2.77285
11.223	2.98537
11.352	3.45244
11.481	3.46459
11.61	3.22108
11.739	3.24135
11.868	3.29102
11.997	3.22517
12.126	3.27
12.255	3.63114
12.384	3.96509
12.513	4.36416
12.642	4.56271
12.771	4.52962
12.9	4.38229
13.029	4.29147
13.158	4.23612
13.287	4.06676
13.416	3.7546
13.545	3.41181
13.674	3.04031
13.803	2.97997
13.932	2.51334
14.061	2.00332
14.19	1.62391
14.319	1.51203
14.448	1.23276
14.577	0.84183
14.706	0.66735
14.835	0.69139
14.964	0.70335
15.093	0.71588
15.222	0.56004
15.351	0.46572
15.48	0.40894
15.609	0.29279
15.738	0.18562
15.867	0.06057
15.996	0.12795
16.125	0.16208
16.254	0.12595
16.383	0.23535
16.512	0.24307
16.641	0.26815
16.77	0.28601
16.899	0.29272
17.028	0.31912
17.157	0.34246
17.286	0.35725
17.415	0.37708
17.544	0.39253
17.673	0.41317
17.802	0.43068
17.931	0.47993
18.06	0.51104
18.189	0.50217
18.318	0.48218
18.447	0.52413
18.576	0.54514
18.705	0.52167
18.834	0.49252
18.963	0.43568
19.092	0.37983
19.221	0.37141
19.35	0.31422
19.479	0.26926
19.608	0.24016
19.737	0.21194
19.866	0.18253
19.995	0.15326
20.124	0.13202
20.253	0.13434
20.382	0.15478
20.511	0.17564
20.64	0.1696
20.769	0.1635
20.898	0.16484
21.027	0.17026
21.156	0.16325
21.285	0.15196
21.414	0.136
21.543	0.13278
21.672	0.1241
21.801	0.12407
21.93	0.12064
22.059	0.13746
22.188	0.13387
22.317	0.12772
22.446	0.13583
22.575	0.13808
22.704	0.15103
22.833	0.16664
22.962	0.18693
23.091	0.18816
23.22	0.1965
23.349	0.19905
23.478	0.19603
23.607	0.19202
23.736	0.18389
23.865	0.15965
23.994	0.14279
24.123	0.12261
24.252	0.09195
24.381	0.08737
24.51	0.09175
24.639	0.09807
24.768	0.07506
24.897	0.10401
25.026	0.11991
25.155	0.14472
25.284	0.16564
25.413	0.18668
25.542	0.19558
25.671	0.20943
25.8	0.21055
25.929	0.21499
26.058	0.20735
26.187	0.20449
26.316	0.21146
26.445	0.2182
26.574	0.21838
26.703	0.21999
26.832	0.22998
26.961	0.22116
27.09	0.19506
27.219	0.16036
27.348	0.16687
27.477	0.18926
27.606	0.21389
27.735	0.23765
27.864	0.24911
27.993	0.25788
28.122	0.25681
28.251	0.25837
28.38	0.26108
28.509	0.25532
28.638	0.27099
28.767	0.28641
28.896	0.2858
29.025	0.28603
29.154	0.29464
29.283	0.28727
29.412	0.28003
29.541	0.25622
29.67	0.24796
29.799	0.2464
29.928	0.26783
30.057	0.2757
30.186	0.28502
30.315	0.28105
30.444	0.26561
30.573	0.25485
30.702	0.24512
30.831	0.24557
30.96	0.28885
31.089	0.29876
31.218	0.32938
31.347	0.32504
31.476	0.33402
31.605	0.3446
31.734	0.34561
31.863	0.35136
31.992	0.35998
32.121	0.33798
32.25	0.33449
32.379	0.34465
32.508	0.38208
32.637	0.35835
32.766	0.37695
32.895	0.38386
33.024	0.37882
33.153	0.37058
33.282	0.35886
33.411	0.3766
33.54	0.41756
33.669	0.40641
33.798	0.41876
33.927	0.40601
34.056	0.37802
34.185	0.34518
34.314	0.32226
34.443	0.31329
34.572	0.27973
34.701	0.25498
34.83	0.24379
34.959	0.23556
35.088	0.23814
35.217	0.20769
35.346	0.21981
35.475	0.18335
35.604	0.17554
35.733	0.16489
35.862	0.16401
35.991	0.17438
36.12	0.20462
36.249	0.2217
36.378	0.24884
36.507	0.25461
36.636	0.26226
36.765	0.28862
36.894	0.31252
37.023	0.32586
37.152	0.32332
37.281	0.31106
37.41	0.28861
37.539	0.27231
37.668	0.25709
37.797	0.2383
37.926	0.21252
38.055	0.17635
38.184	0.17875
38.313	0.16596
38.442	0.14678
38.571	0.11779
38.7	0.12493
38.829	0.13036
38.958	0.13915
39.087	0.1373
39.216	0.14791
39.345	0.15715
39.474	0.19227
39.603	0.20385
39.732	0.22303
39.861	0.24142
39.99	0.25992
40.119	0.27334
40.248	0.28775
40.377	0.32041
40.506	0.32784
40.635	0.31778
40.764	0.32274
40.893	0.32641
41.022	0.30937
41.151	0.28609
41.28	0.28273
41.409	0.27882
41.538	0.26782
41.667	0.25274
41.796	0.25441
41.925	0.24458
42.054	0.24495
42.183	0.20264
42.312	0.19662
42.441	0.19021
42.57	0.18204
42.699	0.20424
42.828	0.22836
42.957	0.25189
43.086	0.25583
43.215	0.26261
43.344	0.26147
43.473	0.28305
43.602	0.27877
43.731	0.27146
43.86	0.28202
43.989	0.28218
44.118	0.29241
44.247	0.28801
44.376	0.2915
44.505	0.27071
44.634	0.25099
44.763	0.21918
44.892	0.22185
45.021	0.20279
45.15	0.19738
45.279	0.17733
45.408	0.16873
45.537	0.17883
45.666	0.19465
45.795	0.17162
45.924	0.11894
46.053	0.15997
46.182	0.2057
46.311	0.24602
46.44	0.29536
46.569	0.36407
46.698	0.44377
46.827	0.49526
46.956	0.55735
47.085	0.5684
47.214	0.61623
47.343	0.6193
47.472	0.62433
47.601	0.61054
47.73	0.58867
47.859	0.52883
47.988	0.51008
48.117	0.46498
48.246	0.38923
48.375	0.2889
48.504	0.22152
48.633	0.22767
48.762	0.2099
48.891	0.15847
49.02	0.14173
49.149	0.15982
49.278	0.16711
49.407	0.16702
49.536	0.19051
49.665	0.19442
49.794	0.23781
49.923	0.22969
50.052	0.24516
50.181	0.24534
50.31	0.23883
50.439	0.22044
50.568	0.21444
50.697	0.16731
50.826	0.15169
50.955	0.13502
51.084	0.12914
51.213	0.12765
51.342	0.11758
51.471	0.08716
51.6	0.11959
51.729	0.1434
51.858	0.16937
51.987	0.19597
52.116	0.22165
52.245	0.24491
52.374	0.26421
52.503	0.27801
52.632	0.28479
52.761	0.28302
52.89	0.27118
53.019
53.148
53.277
53.406
53.535
53.664
53.793
53.922
54.051
54.18
54.309
54.438
54.567
54.696
54.825
54.954
55.083
55.212
55.341
55.47
55.599
55.728
55.857
55.986
56.115
56.244
56.373
56.502
56.631
56.76
56.889
57.018
57.147
57.276
57.405
57.534
57.663
57.792
57.921
58.05
58.179
58.308
58.437
58.566
58.695
58.824
58.953
59.082
59.211
59.34
59.469
59.598
59.727
59.856
59.985
60.114
60.243
60.372
60.501
60.63
60.759
60.888
61.017
61.146
61.275
61.404
61.533
61.662
61.791
61.92
62.049
62.178
62.307
62.436
62.565
62.694
62.823
62.952
63.081
63.21
63.339
63.468
63.597
63.726
63.855
63.984
64.113
64.242
64.371
64.5
64.629
64.758
64.887
65.016
65.145
65.274
65.403
65.532
65.661
65.79
65.919
66.048
66.177
66.306
66.435
66.564
66.693
66.822
66.951
67.08
67.209
67.338
67.467
67.596
67.725
67.854
67.983
68.112
68.241
68.37
68.499
68.628
68.757
68.886
69.015
69.144
69.273
69.402
69.531
69.66
69.789
69.918
70.047
70.176
70.305
70.434
70.563
70.692
70.821
70.95
71.079
71.208
71.337
71.466
71.595
71.724
71.853
71.982
72.111
72.24
72.369
72.498
72.627
72.756
72.885
73.014
73.143
73.272
73.401
73.53
73.659
73.788
73.917
74.046
74.175
74.304
74.433
74.562
74.691
74.82
74.949
75.078
75.207
75.336
75.465
75.594
75.723
75.852
75.981
76.11
76.239
76.368
76.497
76.626
76.755
76.884
77.013
77.142
77.271
77.4
77.529
77.658
77.787
77.916
78.045
78.174
78.303
78.432
78.561
78.69
78.819
78.948
79.077
79.206
79.335
79.464
79.593
79.722
79.851
79.98
80.109
80.238
80.367
80.496
80.625
80.754
80.883
81.012
81.141
81.27
81.399
81.528
81.657
81.786
81.915
82.044
82.173
82.302
82.431
82.56
82.689
82.818
82.947
83.076
83.205
83.334
83.463
83.592
83.721
83.85
83.979
84.108
84.237
84.366
84.495
84.624
84.753
84.882
85.011
85.14
85.269
85.398
85.527
85.656
85.785
85.914
86.043
86.172
86.301
86.43
86.559
86.688
86.817
86.946
87.075
87.204
87.333
87.462
87.591
87.72
87.849
87.978
88.107
88.236
88.365
88.494
88.623
88.752
88.881
89.01
89.139
89.268
89.397
89.526
89.655
89.784
89.913
90.042
90.171
90.3
90.429
90.558
90.687
90.816
90.945
91.074
91.203
91.332
91.461
91.59
91.719
91.848
91.977
92.106
92.235
92.364
92.493
92.622
92.751
92.88
93.009
93.138
93.267
93.396
93.525
93.654
93.783
93.912
94.041
94.17
94.299
94.428
94.557
94.686
94.815
94.944
95.073
95.202
95.331
95.46
95.589
95.718
95.847
95.976
96.105
96.234
96.363
96.492
96.621
96.75
96.879
97.008
97.137
97.266
97.395
97.524
97.653
97.782
97.911
98.04
98.169
98.298
98.427
98.556
98.685
98.814
98.943
99.072
99.201
99.33
99.459
99.588
99.717
99.846
99.975
100.104
100.233
100.362
100.491
100.62
100.749
100.878
101.007
101.136
101.265
101.394
101.523
101.652
101.781
101.91
102.039
102.168
102.297
102.426
102.555
102.684
102.813
102.942
103.071
103.2
103.329
103.458
103.587
103.716
103.845
103.974
104.103
104.232
104.361
104.49
104.619
104.748
104.877
105.006
105.135
105.264
105.393
105.522
105.651
105.78
105.909
106.038
106.167
106.296
106.425
106.554
106.683
106.812
106.941
107.07
107.199
107.328
107.457
107.586
107.715
107.844
107.973
108.102
108.231
108.36
108.489
108.618
108.747
108.876
109.005
109.134
109.263
109.392
109.521
109.65
109.779
109.908
110.037
110.166
110.295
110.424
110.553
110.682
110.811
110.94
111.069
111.198
111.327
111.456
111.585
111.714
