# Supplementary material for: Crash landing of Vibrio cholerae by MSHA pili-assisted braking and anchoring in a viscoelastic environment
Source: eLife. 2021 Jul 2;10:e60655. doi: 10.7554/eLife.60655 (PMC8282333; doi:10.7554/eLife.60655)
Supplement: Figure 3—source data 1. [file elife-60655-fig3-data1.xlsx]

## Sheet: Figure 3b
x axis	y axis	z axis	color map
x position (μm)	y position (μm)	speed (μm/s)	angle (rad)
22.9577	43.5066	4.8037	-0.1697
22.7217	42.9179	4.88684	-0.09267
22.5083	42.5258	4.99311	-0.02921
21.8901	42.0602	5.11773	0.02175
21.2376	41.8512	5.25591	0.06127
20.4655	41.5052	5.40287	0.09045
19.7601	41.2231	5.5538	0.11036
19.2304	41.1586	5.70393	0.12208
18.3837	41.0472	5.84847	0.12668
17.4421	40.9043	5.98263	0.12524
17.2734	40.8173	6.10163	0.11884
16.0971	41.1524	6.29446	0.10092
15.4988	41.3416	5.97178	0.11047
14.9247	41.5471	5.99565	0.10419
14.3078	42.1405	5.95332	0.09038
13.5796	42.8478	6.25981	0.08454
13.1116	43.5741	6.55333	-0.09801
12.9487	44.3133	6.50425	-0.06431
12.689	45.1392	6.42906	0.12071
12.6132	45.9171	6.1314	0.1505
12.5146	46.6456	5.55399	0.22241
12.8167	47.2193	5.50461	0.24759
13.0535	47.6053	5.2007	0.21586
14.0942	47.9943	4.80788	0.38644
14.9188	48.1833	4.44036	0.13648
15.7737	48.4748	4.13324	0.28348
16.1389	48.45	3.69799	0.17001
16.0744	48.4721	3.23286	0.20639
16.1685	48.5402	2.8181	0.16693
16.1352	48.3179	2.41961	-0.16586
16.8675	48.3125	2.00539	-0.39286
17.1318	48.5686	1.56102	-0.42611
17.192	48.8847	1.026	-0.67707
17.0733	48.923	0.92107	-0.89978
17.0893	48.9142	0.83752	-0.99599
17.0986	48.8854	0.93152	-1.29756
17.1233	48.8742	0.83063	-1.339
17.0506	48.9636	0.55167	-1.27101
17.0928	48.9352	0.26887	-1.0026
17.168	48.8963	0.04782	-1.04764
17.1489	48.8945	0.19896	-0.93083
17.1125	48.9154	0.25427	-0.57369
17.1651	48.8884	0.34333	-0.288
17.1346	48.901	0.35332	0.23569
17.0763	48.9227	0.32419	0.18846
17.0854	48.9569	0.30632	0.61121
17.093	48.9241	0.26004	0.70093
17.0793	48.9433	0.28429	0.91436
17.1036	48.9058	0.27221	0.58139
17.0749	48.9472	0.2776	0.37813
17.0725	48.9092	0.25261	0.21657
17.0731	48.8916	0.22883	0.20734
17.0709	48.911	0.23552	0.08381
17.0479	48.9321	0.23329	-0.29604
17.0963	48.9007	0.25258	-0.41914
17.0611	48.9103	0.24124	-0.46329
17.0583	48.9199	0.25514	-0.50772
17.0949	48.9437	0.24042	-0.69346
17.1071	48.9443	0.24858	-0.61728
17.0942	48.924	0.25999	-0.85825
17.0991	48.962	0.26059	-0.59443
17.0872	48.928	0.24361	-0.42238
17.0473	48.9728	0.23418	-0.15534
17.0762	48.9538	0.2374	0.29383
17.0969	48.9362	0.26753	0.37749
17.079	48.9398	0.2912	0.5107
17.1263	48.9116	0.28303	0.35074
17.1196	48.915	0.2863	0.18713
17.0859	48.9417	0.28241	-0.08414
17.0639	48.95	0.27127	0.00793
17.0841	48.9323	0.26267	-0.27887
17.0564	48.9625	0.24505	-0.05059
17.0969	48.92	0.23683	-0.24333
17.0695	48.9617	0.22423	-0.25498
17.1031	48.9419	0.20713	-0.12222
17.1198	48.9333	0.18336	-0.0789
17.124	48.9367	0.17286	-0.16289
17.1067	48.9215	0.16134	-0.11461
17.0806	48.9379	0.1695	-0.36781
17.0777	48.9389	0.15933	-0.53931
17.0765	48.9484	0.16373	-0.33174
17.0769	48.9391	0.16415	-0.25378
17.0877	48.9554	0.1796	-0.17896
17.115	48.9331	0.20274	-0.19053
17.1396	48.9182	0.2358	-0.33373
17.107	48.9221	0.26265	-0.47901
17.0735	48.9377	0.25365	-0.65198
17.1376	48.9319	0.26171	-0.87731
17.1608	48.9165	0.27976	-1.0317
17.1366	48.9197	0.28411	-0.9788
17.1001	48.9391	0.28301	-1.08957
17.1096	48.9521	0.28459	-1.22341
17.142	48.9313	0.28301	-1.28055
17.0981	48.9211	0.27956	-1.31548
17.059	48.9355	0.27415	-1.32411
17.0595	48.9581	0.26667	-1.30235
17.0682	48.9574	0.25703	-1.24613
17.1165	48.9326	0.24514	-1.15135
17.0745	48.9205	0.23089	-1.01395
17.0511	48.949	0.2142	-0.82982
17.0767	48.9374	0.19496	-0.5949
17.1081	48.9376	0.17308	-0.3051
17.1052	48.9283	--	--
