# Supplementary material for: Crash landing of Vibrio cholerae by MSHA pili-assisted braking and anchoring in a viscoelastic environment
Source: eLife. 2021 Jul 2;10:e60655. doi: 10.7554/eLife.60655 (PMC8282333; doi:10.7554/eLife.60655)
Supplement: Figure 3—source data 2. [file elife-60655-fig3-data2.xlsx]

## Sheet: Figure 3c
	number of cases	fraction
rs	284	0.78
rt	80	0.22
sr	148	0.7872
st	40	0.2128
tr	50	0.4356
ts	64	0.5614
