# Supplementary material for: Crash landing of Vibrio cholerae by MSHA pili-assisted braking and anchoring in a viscoelastic environment
Source: eLife. 2021 Jul 2;10:e60655. doi: 10.7554/eLife.60655 (PMC8282333; doi:10.7554/eLife.60655)
Supplement: Figure 4—source data 1. [file elife-60655-fig4-data1.xlsx]

## Sheet: Figure 4a
	Rotation period of cell body (s)
	(416 events)
	0.645
	0.645
	0.516			Bin center	Fraction
	0.774			0.1	0
	0.774			0.3	0.0625
	0.645			0.5	0.15385
	0.645			0.7	0.39904
	0.774			0.9	0.09615
	0.516			1.1	0.14663
	1.935			1.3	0.02885
	1.806			1.5	0.05769
	0.516			1.7	0.01202
	0.645			1.9	0.02163
	1.032			2.1	0.00962
	0.516			2.3	0
	0.645			2.5	0.00481
	0.516			2.7	0
	1.032			2.9	0.0024
	0.645			3.1	0
	1.032			3.3	0.0024
	0.645			3.5	0.0024
	0.774
	0.516
	0.774
	0.774
	0.645
	0.774
	0.645
	0.516
	0.774
	0.774
	0.387
	1.161
	0.774
	0.903
	0.903
	0.774
	0.516
	0.516
	0.645
	0.774
	0.645
	0.645
	0.774
	0.645
	0.645
	0.645
	0.516
	0.645
	0.774
	0.516
	0.645
	0.645
	0.774
	1.032
	0.903
	0.903
	0.774
	0.903
	0.774
	0.903
	0.774
	0.774
	0.774
	1.29
	1.161
	1.548
	1.806
	1.548
	0.645
	0.774
	0.516
	0.387
	0.516
	0.387
	0.387
	0.645
	1.161
	0.516
	0.516
	0.516
	0.774
	0.903
	0.903
	1.161
	1.29
	1.935
	0.645
	0.774
	1.161
	1.161
	0.645
	0.774
	0.774
	0.645
	1.161
	0.645
	0.903
	1.161
	1.032
	1.677
	1.161
	1.548
	1.677
	0.774
	1.419
	0.903
	0.516
	0.645
	1.032
	1.161
	1.29
	1.419
	0.903
	0.903
	2.967
	1.161
	1.161
	0.774
	0.903
	0.516
	0.774
	0.645
	0.645
	0.645
	0.645
	0.645
	1.419
	0.645
	1.032
	1.548
	0.645
	0.903
	0.774
	1.419
	0.774
	2.064
	1.806
	1.677
	1.548
	1.548
	0.774
	0.903
	0.645
	0.645
	0.645
	1.032
	1.548
	0.774
	0.903
	1.161
	0.774
	0.774
	0.645
	0.774
	0.774
	1.161
	1.032
	1.161
	1.419
	1.161
	1.032
	1.032
	0.774
	0.903
	0.645
	0.516
	0.516
	0.516
	0.516
	0.387
	0.645
	0.903
	0.903
	0.774
	0.774
	1.032
	0.774
	1.032
	1.032
	0.774
	1.677
	0.645
	0.903
	0.645
	0.774
	0.645
	1.032
	0.645
	0.645
	0.645
	0.774
	0.645
	0.516
	0.645
	0.645
	1.032
	0.903
	1.548
	1.419
	1.935
	1.161
	0.903
	0.516
	1.032
	1.032
	0.774
	0.903
	1.032
	0.903
	1.419
	1.032
	1.419
	2.193
	1.677
	1.29
	1.161
	1.161
	0.774
	1.29
	1.032
	0.903
	0.774
	1.032
	1.29
	2.193
	1.161
	1.806
	1.161
	0.774
	0.903
	0.645
	1.548
	1.419
	0.516
	0.645
	0.645
	0.774
	0.903
	1.161
	1.161
	1.419
	1.29
	0.645
	0.774
	0.903
	0.645
	0.774
	0.645
	0.774
	0.903
	0.903
	1.032
	0.645
	2.451
	0.903
	1.032
	1.161
	1.419
	1.032
	0.903
	1.161
	1.161
	2.064
	0.516
	0.516
	0.645
	0.903
	0.645
	0.645
	0.645
	0.903
	0.387
	0.516
	0.774
	0.645
	0.645
	0.645
	0.516
	0.645
	0.645
	0.645
	0.645
	0.774
	0.774
	0.516
	0.258
	0.516
	0.516
	0.516
	0.645
	1.29
	3.483
	3.225
	0.516
	0.774
	0.645
	0.774
	0.645
	0.774
	0.645
	0.645
	0.903
	0.903
	0.774
	0.645
	0.516
	0.516
	0.774
	0.903
	0.645
	0.645
	0.516
	0.774
	1.032
	0.516
	0.645
	0.645
	0.645
	0.645
	0.774
	0.516
	0.645
	0.774
	1.161
	0.645
	0.645
	1.032
	0.516
	0.387
	0.387
	0.516
	0.774
	0.903
	1.161
	1.032
	1.161
	0.387
	0.645
	0.774
	1.032
	0.516
	0.387
	1.032
	1.935
	1.29
	1.29
	0.903
	1.032
	0.774
	0.774
	0.516
	0.516
	0.645
	0.387
	0.645
	0.387
	0.387
	0.516
	0.387
	0.516
	0.387
	0.516
	0.516
	0.387
	0.387
	0.387
	0.774
	0.387
	0.516
	0.516
	0.387
	0.387
	0.516
	0.645
	0.516
	0.387
	0.516
	0.387
	0.516
	0.516
	0.516
	0.774
	0.516
	0.516
	0.387
	0.516
	0.645
	0.645
	0.516
	1.419
	0.903
	2.58
	1.419
	0.516
	0.516
	0.387
	0.516
	1.032
	1.548
	0.774
	0.774
	0.645
	0.774
	0.645
	0.516
	0.645
	0.645
	0.774
	1.29
	0.774
	0.645
	0.774
	1.29
	1.806
	1.419
