# Supplementary material for: Crash landing of Vibrio cholerae by MSHA pili-assisted braking and anchoring in a viscoelastic environment
Source: eLife. 2021 Jul 2;10:e60655. doi: 10.7554/eLife.60655 (PMC8282333; doi:10.7554/eLife.60655)
Supplement: Figure 4—source data 2. [file elife-60655-fig4-data2.xlsx]

## Sheet: Figure 4b
	Body rotation rate (Hz)	Mean speed (μm/s)
	1.29199	5.46061
	1.29199	5.07185
	1.55039	3.09874
	1.55039	4.09193
	1.55039	2.19602
	0.96899	2.51813
	1.93798	2.32644
	1.55039	3.90178
	1.55039	5.90544
	0.86133	2.29939
	1.55039	3.56946
	0.96899	4.71581
	1.55039	4.71109
	1.29199	5.02515
	1.93798	4.99304
	1.29199	4.09602
	1.29199	4.2156
	1.55039	4.68935
	1.29199	4.61549
	1.55039	4.96326
	1.93798	4.94528
	1.29199	4.90202
	1.10742	2.92249
	1.93798	4.65156
	0.86133	3.59178
	1.29199	4.58776
	0.96899	3.93052
	0.96899	2.12768
	1.29199	2.08506
	1.55039	4.79078
	1.29199	5.08951
	1.55039	1.3312
	1.55039	1.15902
	1.55039	3.64294
	1.29199	4.22778
	1.93798	4.54909
	1.55039	4.71541
	1.55039	4.27598
	1.29199	3.35573
	0.96899	2.75497
	1.10742	3.27412
	1.10742	3.57677
	1.29199	3.55713
	1.10742	2.8276
	1.29199	2.91944
	1.10742	3.19101
	1.29199	3.33648
	1.29199	3.49993
	1.10742	3.21702
	0.77519	3.81439
	0.86133	3.20297
	0.64599	2.67253
	0.55371	2.93642
	0.5963	2.90567
	1.55039	6.13289
	1.29199	6.01561
	1.93798	5.73835
	2.58398	4.97759
	1.93798	4.40262
	2.58398	4.19972
	1.93798	3.75983
	1.55039	2.08866
	0.77519	1.84061
	1.93798	2.91796
	1.93798	3.50654
	1.55039	4.06037
	0.86133	1.93445
	0.77519	1.84992
	1.55039	3.95905
	1.10742	3.5523
	1.10742	3.83873
	1.55039	4.29408
	0.77519	1.85501
	1.55039	3.46374
	1.10742	1.67538
	0.86133	2.06533
	0.96899	1.66811
	0.5963	2.16022
	0.86133	3.11825
	0.64599	2.66243
	0.5963	2.65143
	1.29199	3.02989
	0.70472	2.38656
	0.96899	1.81076
	1.93798	3.77722
	1.29199	3.21631
	0.96899	2.49861
	0.70472	1.60533
	0.77519	1.95651
	0.64599	1.92938
	0.64599	1.96551
	1.55039	2.68338
	0.96899	2.72133
	0.64599	2.04409
	1.55039	3.4152
	1.10742	3.84814
	1.29199	3.98505
	0.64599	2.28012
	1.29199	2.78937
	0.456	1.1358
	0.55371	2.10422
	0.64599	2.17499
	0.64599	2.74483
	0.77519	2.24975
	0.96899	2.66103
	0.408	1.26553
	1.29199	2.97427
	1.10742	3.37265
	1.55039	3.42511
	1.93798	3.38501
	1.93798	3.25693
	1.29199	2.84452
	1.93798	2.64481
	0.96899	2.3427
	1.10742	1.51704
	0.86133	1.72249
	1.10742	2.04985
	1.29199	2.36957
	0.96899	1.94621
	1.29199	2.24873
	0.96899	1.54444
	0.96899	1.84321
	1.29199	2.20962
	1.10742	1.64608
	1.55039	2.57476
	1.10742	2.16696
	1.55039	2.68727
	0.96899	2.00391
	1.10742	2.41246
	1.55039	3.53466
	1.55039	3.47986
	1.55039	3.64383
	1.29199	3.4234
	0.86133	2.35725
	1.93798	4.33862
	1.55039	4.52054
	1.29199	3.76516
	0.77519	2.09036
	0.96899	2.61244
	0.70472	2.67966
	0.70472	2.5964
	0.43066	1.66196
	1.10742	2.43346
	0.55371	1.78479
	0.96899	2.82504
	1.10742	3.3258
	0.96899	3.22143
	1.29199	3.98913
	1.10742	3.35686
	0.86133	1.96025
	1.29199	3.1529
	0.86133	2.99586
	0.86133	2.96627
	0.70472	2.30915
	0.43066	1.43402
	0.5963	1.8007
	0.77519	2.14897
	0.70472	1.85528
	0.86133	2.46945
	1.29199	2.78927
	0.77519	2.60161
	0.96899	2.46902
	1.10742	2.67192
	1.29199	2.95853
	0.64599	2.45995
	0.5963	1.83433
	0.43066	1.25451
	0.96899	2.93706
	0.55371	1.86157
	0.86133	2.50252
	1.55039	3.7187
	1.55039	4.09201
	1.29199	3.03124
	0.96899	2.75261
	1.29199	3.37528
	1.29199	4.06378
	1.29199	3.0763
	0.96899	3.49306
	1.93798	4.02521
	1.55039	3.85376
	1.10742	3.46626
	1.29199	3.43328
	0.86133	2.36147
	1.10742	3.10081
	1.29199	3.18993
	1.29199	3.43763
	1.29199	4.34965
	1.29199	3.80055
	0.64599	1.33723
	1.55039	4.99106
	2.58398	5.34745
	1.55039	6.29586
	1.55039	5.86847
	1.55039	5.41381
	1.29199	5.05215
	0.70472	2.7598
	0.28711	1.05069
	0.3876	1.10655
	1.55039	3.95712
	1.29199	4.54202
	1.10742	4.0808
	1.29199	4.51938
	1.10742	5.12367
	1.29199	6.26162
	1.29199	2.54435
	0.96899	2.26689
	0.96899	2.27823
	1.10742	2.56371
	1.29199	3.00105
	1.55039	3.09532
	1.10742	2.27918
	0.96899	1.46385
	0.96899	1.74912
	1.29199	2.13344
	1.55039	4.74513
	1.10742	4.67718
	0.96899	4.1383
	1.55039	4.64289
	1.29199	4.49827
	1.29199	2.88263
	1.29199	2.95307
	1.29199	2.70707
	1.10742	3.15395
	1.55039	2.92663
	1.29199	3.0092
	1.10742	2.80248
	0.77519	2.56156
	1.55039	3.98135
	0.96899	4.32657
	1.55039	5.28987
	1.93798	4.8023
	2.58398	4.91321
	1.55039	4.26908
	0.96899	3.02667
	0.96899	2.09065
	0.77519	1.81086
	0.86133	1.98796
	0.77519	2.34047
	1.93798	3.62277
	1.29199	3.64606
	1.10742	2.9101
	0.96899	3.20086
	1.55039	4.75431
	0.86133	2.91324
	0.5168	2.71656
	0.70472	3.23856
	0.77519	2.89427
	0.43066	2.27194
	0.96899	3.28677
	1.29199	3.27197
	1.29199	2.93216
	0.86133	2.16136
	0.96899	2.15248
	1.55039	3.74559
	1.93798	3.89159
	1.29199	3.30096
	1.10742	3.0028
	1.93798	3.55749
	1.93798	3.93223
	1.93798	3.52893
	1.93798	3.47279
	1.55039	3.51679
	1.10742	2.79551
	1.29199	3.21457
	1.93798	3.22714
	1.93798	3.2528
	1.93798	3.72324
	1.55039	3.87376
	1.55039	3.96743
	1.55039	3.82488
	1.10742	2.76664
	1.10742	3.23399
	1.55039	3.31589
	1.29199	4.75142
	1.93798	5.14005
	1.93798	5.18297
	2.58398	5.08709
	1.93798	4.95449
	1.55039	4.50586
	1.55039	4.38284
	1.29199	3.48074
	0.64599	1.70418
	1.10742	3.479
	0.3876	2.15418
	0.64599	2.73536
	1.93798	5.76165
	1.93798	6.1483
	2.58398	6.15924
	1.93798	6.08197
	0.96899	4.78502
	0.64599	3.96906
	1.10742	5.10015
	1.29199	4.43643
	1.29199	4.16662
	1.29199	4.38773
	1.55039	4.02072
	0.96899	3.12684
	1.29199	3.85368
	1.10742	3.68942
	0.77519	2.68141
	1.29199	4.07352
	1.29199	3.89021
	1.10742	2.12926
	0.64599	1.73768
	0.5168	1.41125
	0.70472	2.04199
	1.29199	1.95295
	1.10742	1.92937
	1.10742	1.92937
	0.64599	0.72898
	0.70472	0.4445
	0.55371	0.48413
	1.55039	1.6453
	1.55039	2.11064
	1.29199	1.68989
	1.10742	1.57716
	0.86133	1.58664
	0.86133	1.61984
	0.70472	0.73202
	0.77519	1.055
	1.93798	2.32687
	1.29199	2.22699
	1.10742	1.90544
	1.55039	1.82362
	1.29199	2.26281
	1.55039	2.44081
	1.29199	1.97857
	1.10742	1.60781
	1.10742	1.77654
	0.96899	1.89185
	1.55039	1.85833
	0.408	0.89331
	1.10742	1.89464
	0.96899	1.60527
	0.86133	1.50154
	0.86133	1.50154
	0.96899	1.57191
	1.10742	1.61523
	0.86133	1.38185
	0.86133	1.06652
	0.4845	0.68032
