# Supplementary material for: Crash landing of Vibrio cholerae by MSHA pili-assisted braking and anchoring in a viscoelastic environment
Source: eLife. 2021 Jul 2;10:e60655. doi: 10.7554/eLife.60655 (PMC8282333; doi:10.7554/eLife.60655)
Supplement: Figure 4—source data 3. [file elife-60655-fig4-data3.xlsx]

## Sheet: Figure 4d
	Time (s)	Angular velocity (rad/s)
CCW	1.17	-6.04152
CW	4.29	3.22215
	5.98	4.02768
	7.54	4.02768
	9.1	3.71786
	10.79	3.71786
	12.48	4.02768
	14.04	4.02768
	15.86	3.02076
	17.94	3.02076
	19.89	3.22215
	21.71	4.02768
	23.27	4.02768
	24.96	3.4523
	27.69	1.66663
	30.42	4.02768
	31.98	4.02768
	33.67	3.4523
	35.49	3.4523
	37.44	3.02076
	39.39	3.4523
	41.21	2.84307
	43.42	3.22215
	45.5	3.02076
	47.45	3.4523
	49.66	2.30153
	54.6	1.38092
