# Supplementary material for: Crash landing of Vibrio cholerae by MSHA pili-assisted braking and anchoring in a viscoelastic environment
Source: eLife. 2021 Jul 2;10:e60655. doi: 10.7554/eLife.60655 (PMC8282333; doi:10.7554/eLife.60655)
Supplement: Figure 4—source data 4. [file elife-60655-fig4-data4.xlsx]

## Sheet: Figure 4e
Angular speed (rad/s)
	vertical tethering	horizontal tethering
	4.83077	5.36752
	6.03846	6.03846
	6.03846	6.03846
	6.03846	4.83077
	4.83077	4.83077
	5.36752	4.39161
	6.9011	3.22051
	5.36752	2.01282
	9.66154	1.61026
	9.66154	1.61026
	12.0769	0.86264
	9.66154	2.01282
	9.66154	1.78917
	12.0769	1.85799
	6.9011	2.01282
	9.66154	1.85799
	9.66154	2.41538
	9.66154	2.41538
	8.05128	1.12343
	9.66154	1.27126
	9.66154	0.87832
	8.05128	1.05017
	9.66154	1.23866
	6.9011	0.58202
	9.66154	1.0735
	8.05128	0.96615
	9.66154	0.54895
	9.66154	0.2825
	9.66154	0.14818
	9.66154	2.84163
	9.66154	2.68376
	9.66154	2.30037
	9.66154	2.10033
	9.66154	1.0735
	6.9011	0.68039
	6.9011	0.71041
	6.9011	1.0735
	9.66154	1.72527
		0.86264
		1.30561
		1.34188
		1.05017
		1.0979
		0.96615
		0.73193
		1.0735
		0.8475
		0.81877
		0.8475
		0.71041
		0.46007
		0.28086
		0.30382
		2.84163
		1.93231
		2.54251
		1.93231
		1.78917
		2.10033
		0.77916
		2.1958
		1.61026
		0.89459
		1.46387
		1.23866
		0.96615
		1.85799
		1.72527
		1.55831
		1.61026
		0.72101
		0.98587
		1.23866
		1.0979
		2.68376
		2.01282
		6.03846
		9.66154
		8.05128
		6.03846
		5.36752
		6.9011
		5.36752
		6.9011
		0.53675
		2.68376
		1.85799
		1.55831
		1.85799
		0.42007
		0.56172
		0.69011
		0.60385
		0.3552
		0.4275
		0.40939
		0.35006
		0.52508
		0.57509
		6.9011
		3.71598
		5.36752
		6.03846
		8.05128
		6.03846
		6.9011
		8.05128
		8.05128
		5.36752
		6.9011
		6.03846
		6.9011
		6.9011
		8.05128
		6.03846
		6.9011
		6.9011
		6.9011
		5.36752
		6.9011
		2.1958
		5.36752
		6.9011
		5.36752
		5.36752
		5.36752
		6.03846
		6.03846
		1.02782
		0.40595
		1.20769
		1.30561
		0.6441
		4.83077
		6.9011
		8.05128
		3.71598
		2.54251
		6.03846
		6.9011
		4.83077
		2.41538
		5.36752
		5.36752
		6.03846
		5.36752
		8.05128
		6.03846
		6.03846
		4.02564
		5.36752
		1.72527
		1.27126
		1.12343
		1.12343
		1.85799
		1.46387
		1.72527
		1.50962
		2.54251
		0.77916
		1.72527
		1.0979
		0.61149
		0.16211
		0.60385
		1.55831
		1.0979
		1.61026
		0.6441
		1.61026
		3.45055
		4.02564
		2.84163
		1.50962
		3.01923
		1.38022
		1.61026
		1.93231
		1.85799
		0.58912
		0.92899
		0.4736
		2.1958
		1.61026
		1.72527
		1.55831
		1.55831
		1.00641
		4.39161
		4.83077
		4.39161
		3.22051
		2.30037
		1.85799
		0.8475
		1.72527
		1.72527
		3.45055
		0.94721
		2.54251
		4.02564
		4.39161
		4.83077
		4.39161
		4.39161
		4.83077
		4.02564
		5.36752
		4.83077
		4.02564
		4.02564
		4.39161
		4.39161
		2.68376
		3.22051
		4.02564
		4.02564
		3.71598
		3.71598
		4.02564
		4.02564
		3.01923
		3.01923
		3.22051
		4.02564
		4.02564
		3.45055
		1.66578
		4.02564
		4.02564
		3.45055
		3.45055
		3.01923
		3.45055
		2.84163
		3.22051
		3.01923
		3.45055
		2.30037
		1.38022
