# Supplementary material for: Crash landing of Vibrio cholerae by MSHA pili-assisted braking and anchoring in a viscoelastic environment
Source: eLife. 2021 Jul 2;10:e60655. doi: 10.7554/eLife.60655 (PMC8282333; doi:10.7554/eLife.60655)
Supplement: Figure 5—source data 1. [file elife-60655-fig5-data1.xlsx]

## Sheet: Figure 5c
Rg		WT in 2% LB		WT in 2% LB+1% MC		WT in 2% LB+20% Ficoll				△mshA in 2% LB only		△mshA in 2% LB+1% MC		△mshA in 2% LB+20% Ficoll
	-1.5	0	-4.5	0	2.5	0.08642			0.5	0.00138	1.5	0.00726	2.5	0
	-0.5	0	-3.5	0	3.5	0.11111			1.5	0.02349	2.5	0.03065	3.5	0
	0.5	0.04776	-2.5	0	4.5	0.03704			2.5	0.05443	3.5	0.06855	4.5	0.02
	1.5	0.04478	-1.5	0	5.5	0.08642			3.5	0.10942	4.5	0.07339	5.5	0.02
	2.5	0.02388	-0.5	0	6.5	0.09877			4.5	0.13678	5.5	0.08629	6.5	0.02
	3.5	0.03284	0.5	0.33333	7.5	0.06173			5.5	0.12987	6.5	0.08226	7.5	0.08
	4.5	0.07761	1.5	0.21585	8.5	0.07407			6.5	0.09367	7.5	0.07661	8.5	0.12
	5.5	0.13433	2.5	0.12295	9.5	0.07407			7.5	0.06355	8.5	0.0621	9.5	0.04
	6.5	0.13134	3.5	0.0847	10.5	0.07407			8.5	0.05637	9.5	0.07177	10.5	0.04
	7.5	0.10149	4.5	0.06831	11.5	0.03704			9.5	0.03647	10.5	0.05242	11.5	0.14
	8.5	0.0806	5.5	0.03279	12.5	0.03704			10.5	0.03426	11.5	0.04194	12.5	0.04
	9.5	0.05373	6.5	0.01913	13.5	0.02469			11.5	0.02653	12.5	0.03065	13.5	0
	10.5	0.07761	7.5	0.03005	14.5	0.03704			12.5	0.02597	13.5	0.02581	14.5	0.08
	11.5	0.04478	8.5	0.01639	15.5	0.01235			13.5	0.02211	14.5	0.02903	15.5	0.02
	12.5	0.03284	9.5	0.02186	16.5	0.01235			14.5	0.02017	15.5	0.02903	16.5	0.08
	13.5	0.02985	10.5	0.0082	17.5	0.02469			15.5	0.02017	16.5	0.01774	17.5	0.08
	14.5	0.01493	11.5	0.01366	18.5	0.01235			16.5	0.01603	17.5	0.02258	18.5	0
	15.5	0.02687	12.5	0.00546	19.5	0.01235			17.5	0.01603	18.5	0.01694	19.5	0
	16.5	0.01493	13.5	0.00273	20.5	0			18.5	0.00995	19.5	0.01774	20.5	0.06
	17.5	0.00597	14.5	0.01093	21.5	0.03704			19.5	0.01078	20.5	0.01371	21.5	0
	18.5	0.00299	15.5	0	22.5	0			20.5	0.00829	21.5	0.00887	22.5	0.06
	19.5	0.00896	16.5	0	23.5	0			21.5	0.01022	22.5	0.01129	23.5	0.02
	20.5	0	17.5	0	24.5	0.01235			22.5	0.01133	23.5	0.00806	24.5	0
	21.5	0.00299	18.5	0	25.5	0			23.5	0.00746	24.5	0.01129	25.5	0
	22.5	0.00299	19.5	0.00273	26.5	0			24.5	0.00912	25.5	0.0129	26.5	0
	23.5	0	20.5	0	27.5	0			25.5	0.00442	26.5	0.00726	27.5	0.02
	24.5	0.00299	21.5	0	28.5	0			26.5	0.00497	27.5	0.01048	28.5	0
	25.5	0	22.5	0	29.5	0.01235			27.5	0.00332	28.5	0.00726	29.5	0
	26.5	0	23.5	0	30.5	0			28.5	0.00387	29.5	0.00645	30.5	0
	27.5	0	24.5	0.00273	31.5	0			29.5	0.00387	30.5	0.00645	31.5	0
	28.5	0.00299	25.5	0.00273	32.5	0.01235			30.5	0.00359	31.5	0.000806452	32.5	0.02
	29.5	0	26.5	0	33.5	0			31.5	0.00387	32.5	0.00726	33.5	0
	--	--	27.5	0	34.5	0			32.5	0.00276	33.5	0.00726	34.5	0
	--	--	28.5	0.00273	35.5	0			33.5	0.00193	34.5	0.00645	35.5	0
	--	--	29.5	0	36.5	0			34.5	0.00138	35.5	0.00323	36.5	0
	--	--	30.5	0	37.5	0.01235			35.5	0.00193	36.5	0.00484	37.5	0.02
	--	--	31.5	0	38.5	0			36.5	0.00221	37.5	0.00161	38.5	0
	--	--	32.5	0	--	--			37.5	0.00166	38.5	0.00403	39.5	0
	--	--	33.5	0	--	--			38.5	0.000552639	39.5	0.00403	40.5	0.02
	--	--	34.5	0	--	--			39.5	0.00138	40.5	0.00242	41.5	0
	--	--	35.5	0					40.5	0.00166	41.5	0.00242
	--	--	36.5	0					41.5	0.000552639	42.5	0.000806452
	--	--	37.5	0					42.5	0.000552639	43.5	0.00161
	--	--	38.5	0					43.5	0.000828958	44.5	0.00161
	--	--	39.5	0					44.5	0	45.5	0.000806452
	--	--	40.5	0					45.5	0.000276319	46.5	0.000806452
	--	--	41.5	0					46.5	0	47.5	0
	--	--	42.5	0					47.5	0	48.5	0.000806452
	--	--	43.5	0.00273					48.5	0.000276319	49.5	0.000806452
	--	--	44.5	0					49.5	0	50.5	0.00161
									50.5	0	51.5	0
									51.5	0	--	--
									52.5	0.000276319	--	--
