# Supplementary material for: Crash landing of Vibrio cholerae by MSHA pili-assisted braking and anchoring in a viscoelastic environment
Source: eLife. 2021 Jul 2;10:e60655. doi: 10.7554/eLife.60655 (PMC8282333; doi:10.7554/eLife.60655)
Supplement: Figure 5—source data 2. [file elife-60655-fig5-data2.xlsx]

## Sheet: Figure 5d
	△mshA in 2% LB				WT in 2% LB				△mshA in 1% MC				WT in 1% MC				△mshA in 20% Ficoll				WT in 20% Ficoll
35.8539	43.2507	19.4222		40.6005	43.7741	29.5503		69.7493	34.1883	19.3222		22.6668	33.6574	25.1823		110.403	62.0724	54.5552		52.5148	118.736	89.5394
13.1238	32.1574	12.521		49.3122	27.5684	32.749		30.1749	31.5696	42.4254		3.31666	37.1509	107.946		51.0425	106.611	136.663		61.9606	33.3352	53.5714
146.867	16.133	78.1544		56.0493	28.223	148.952		59.3029	56.1278	13.3995		14.4548	7.18204	186.083		137.677	28.3776	85.1848		64.4694	61.6792	78.1083
27.6659	98.7074	93.2892		18.3919	69.6803	80.0711		34.8565	55.745	58.32		173.935	3.4041	42.8353		108.072	29.7447	107.16		215.397	113.518	78.2411
12.2835	9.06198	12.9184		26.3373	48.7116	73.224		36.5121	29.781	47.5637		61.6319	19.5403	89.2608		81.2514	87.3854	52.8729		55.6747	212.219	149.931											Repeated Measures ANOVA
20.3542	10.3048	28.8843		31.3774	56.5825	69.0703		35.5367	488.802	352.442		43.199	9.37339	10.2793		62.8571	39.5021	53.0817		45.5424	116.504	38.1856											P value	< 0.0001
11.6332	26.7682	29.013		41.922	86.8957	36.6637		107.962	77.0132	212.795		66.9026	11.9811	17.373		89.0044	149.052	30.491		31.4853	78.8601	175.895											P value summary	***
25.8259	12.0411	60.0353		25.3081	62.7276	51.4652		79.8607	34.7904	124.977		24.9325	75.0875	12.2685		153.381	28.5897	55.9486		74.2664	45.5172	62.6343											Are means signif. different? (P < 0.05)	Yes
14.5378	22.1415	26.719		134.798	33.2301	109.878		29.3589	34.0141	52.2265		213.462	82.882	18.811		52.3201	33.6781	71.8014		69.723	72.1871	56.0444											Number of groups	6
45.0174	19.6277	13.4654		18.5905	31.1017	21.7981		36.0498	30.3398	95.3441		41.0007	6.10891	12.5343		29.8035	24.1171	42.5897		168.319	209.119	76.8336											F	19.9
31.6817	13.8283	26.5618		19.199	19.7775	19.047		44.9294	47.8915	23.4628		40.9171	16.7852	330.777		59.0745	18.8635	63.3297		42.5611	25.2655	40.4095											R squared	0.9087
38.4001	52.0478	29.294		52.4551	38.0907	67.5767		61.3964	175.083	63.8462		25.7801	33.9299	43.2268		40.9169	80.2965	28.4159		40.4975	17.6364	142.891
62.8696	35.6208	32.6556		67.7177	82.3829	25.881		93.8619	104.356	52.1254		14.0038	40.5192	41.5505		85.278	75.8862	59.6466		124.083	39.5051	180.736			Mean values:								Was the pairing significantly effective?
28.1898	19.4212	34.0565		19.6249	61.4621	12.3537		38.2963	34.3552	43.8307		19.0805	15.2353	119.267		31.4592	80.092	45.5472		54.3289	124.281	35.8781											R squared	0.00671
12.5025	58.7514	5.87963		22.7128	37.9382	49.01		122.026	68.6059	14.1425		25.5675	19.0963	7.85325			30.6018	47.4789		44.5163	360.376	48.4686			△mshA in 2% LB＀	WT in 2% LB	△mshA in 1% MC＀	WT in 1% MC	△mshA in 20% Ficoll	WT in 20% Ficoll			F	0.3699
17.3859	19.0729	86.5838		124.238	220.764	28.0012		81.3284	18.7919	62.5476		32.4804	15.9366	33.6219			55.9601			86.0466	37.3621	119.358			44.1951	51.6977	66.8485	45.4155	78.0387	74.0079			P value	0.6999
219.376	32.0159	64.7026		17.0344	22.2035	32.6898		38.404	10.3834	31.0896		35.2525	10.8308	7.65528			45.6277			37.474	85.317	83.7993			43.8221	64.3067	79.5241	35.1006	54.9399	89.5092			P value summary	ns
6.59434	13.8798	208.394		52.6009	18.3503	52.8721		24.3205	49.0619	22.9526		51.1272	6.47791	16.4327			36.8643			48.9	60.3097	70.1594			45.6152	59.3719	73.3188	39.6493	62.3178	95.4751			Is there significant matching? (P < 0.05)	No
96.4684	49.6969	57.1545		50.8003	22.2743	23.9608		26.1297	51.0981	18.5662		23.8075	13.2279	43.0968			30.5364			115.817	139.384	82.5874
34.3529	28.7533	14.1504		60.9055	39.2219	22.624		50.4896	102.302	75.2922		54.8365	38.2368	21.1714						22.6807	102.129	58.4302											ANOVA Table	SS	df	MS
66.664	64.489	35.9786		19.3648	49.8203	45.0485		20.6427	27.1255	56.2489		12.137	14.2352	39.2779						57.9256	99.6564	97.0511											Treatment (between columns)	6562	5	1312
19.8999	72.8728	296.257		40.3534	47.7924	43.4685		16.9519	24.8363	31.8246		7.42036	14.3893	12.831						63.8216	28.5727	99.7064											Individual (between rows)	48.78	2	24.39
11.8348	21.2118	16.3009		68.3865	18.8416	10.9917		17.6181	144.795	232.78		8.95056	6.58267	13.0255						70.4909	54.9312	189.139											Residual (random)	659.4	10	65.94
13.7311	18.6079	65.2224		20.8524	20.5312	107.59		20.1918	55.0275	40.1804		7.53404	10.3979	16.8904						116.139	86.931	183.805											Total	7270	17
57.6372	23.2408	69.1134		41.8837	58.1841	102.385		32.1107	16.9566	219.769		120.265	9.3359	7.40947						16.6535	41.1162
10.9064	62.5087	78.8412		42.0379	25.5974	19.682		24.4253	34.7842	33.188		14.0136	15.2341	14.3966						55.8629	28.0482												Tukey's Multiple Comparison Test	Mean Diff.	q	Significant? P < 0.05?	Summary	95% CI of diff
26.9702	120.513	20.8896		41.06	39.1918	114.624		44.5857	9.17273	149.223		42.2203	15.289	14.0241						209.803	113.006												△mshA in 2% LB vs WT in 2% LBt	-13.91	2.968	No	ns	-36.94 to 9.114
19.7965	7.84299	79.6255		92.229	45.9914	42.0524		118.262	19.2682	60.3888		7.1568	72.5655	53.4433						25.2664	43.4664												△mshA in 2% LB vs △mshA in 1% MC‭䵒	-28.69	6.119	Yes	*	-51.71 to -5.658
19.2687	23.3423	23.12		38.2631	252.981	24.0284		38.0022	34.7854	15.9273		104.439	36.4905	78.2159							138.681												△mshA in 2% LB vs WT in 1% MC	17.03	3.633	No	ns	-5.994 to 40.06
54.1465	24.9672	33.3024		19.7422	96.8992	9.05441		46.2479	33.292	193.876		66.8729	48.7581	20.92							57.2063												△mshA in 2% LB vs △mshA in 20% Ficoll_x0004_Ѐ	-20.55	4.384	No	ns	-43.58 to 2.474
12.2828	62.1197	64.9281		32.0022	21.8264	24.0614		188.614	77.7741	24.8829		64.8979	8.9401	24.327							42.0027												△mshA in 2% LB vs WT in 20% Ficollo	-41.79	8.913	Yes	***	-64.81 to -18.76
17.3907	18.4051	22.2543		75.0322	28.5145	51.3354		50.3358	25.0444	56.0522		13.9527	43.1341	34.7047							77.4361												WT in 2% LB vs △mshA in 1% MC	-14.77	3.151	No	ns	-37.80 to 8.257
36.9985	28.1331	48.6552		85.3462	27.8589	70.0273		37.3842	20.9887	11.7693		6.28947	76.5582	9.07011																			WT in 2% LB vs WT in 1% MC	30.95	6.601	Yes	**	7.920 to 53.98
62.6441	10.8103	75.7815		41.5478	345.287	79.174		67.6189	14.318	34.0794		28.86	6.02425	24.5471																			WT in 2% LB vs △mshA in 20% Ficollo	-6.64	1.416	No	ns	-29.67 to 16.39
39.1172	24.9517	26.3669		37.7246	43.0022	27.0729		23.0526	47.8066	49.2101		25.2245	10.913	105.949																			WT in 2% LB vs WT in 20% Ficoll	-27.87	5.945	Yes	*	-50.90 to -4.844
247.245	22.6005	98.2049		22.6764	21.3723	86.5486		60.6157	137.882	31.4868		22.1362	14.1413	32.3743																			△mshA in 1% MC vs WT in 1% MCo	45.72	9.752	Yes	***	22.69 to 68.75
21.7079	21.5435	15.4006		28.7967	36.6849	41.0371		54.0157	34.8755	318.48		16.4215	11.6135	24.1154																			△mshA in 1% MC vs △mshA in 20% Ficoll_x0004_Ѐ	8.132	1.735	No	ns	-14.90 to 31.16
158.41	160.562	18.4699		34.4622	32.3146	83.6465		39.1227	48.4447	59.6657		21.6122	36.9337	22.9778																			△mshA in 1% MC vs WT in 20% Ficollo	-13.1	2.794	No	ns	-36.13 to 9.928
54.529	21.8295	41.5316		101.576	37.361	16.442		35.9252	209.191	17.1412		42.3937	27.8346	23.2251																			WT in 1% MC vs △mshA in 20% Ficollo	-37.59	8.018	Yes	**	-60.62 to -14.56
21.9803	20.4857	76.4226		24.06	20.9574	46.8795		64.6819	37.3887	25.6746		30.3283	8.85103	65.4916																			WT in 1% MC vs WT in 20% Ficoll	-58.82	12.55	Yes	***	-81.85 to -35.79
19.9128	28.6574	13.8421		32.853	18.975	24.9501		33.1776	24.4249	157.294		67.7729	15.6603	9.29047																			△mshA in 20% Ficoll vs WT in 20% Ficoll_x0001_	-21.23	4.529	No	ns	-44.26 to 1.796
111.027	40.8805	29.5237		45.7044	9.07973	34.5836		95.6229	24.1234	10.9352		167.56	52.722	50.3514
55.4559	112.422	14.4377		33.6711	80.3124	16.7865		67.0957	141.424	27.6315		16.9309	62.4866	15.1017
13.9162	22.1634	20.0418		24.5758	51.6254	27.1174		136.433	24.5503	22.2853		73.9423	4.09131	9.73429
90.2682	18.8881	41.5612		24.8863	91.1682	26.0476		13.0807	18.5105	21.1724		198.569	32.6019	56.1196
42.42	19.3354	21.3712		83.7337	742.41	39.1662		98.6875	90.394	83.7091		37.2303	10.0799	80.0208
15.458	16.5753	29.7695		44.9427	36.1739	24.626		20.8818	34.1001	36.0538		21.0556	14.5069	66.3441
15.5339	59.8338	31.7943		179.152	213.518	29.0276		25.1194	53.1421	78.6843		11.4982	6.91776	19.3502
25.2035	19.1474	18.076		46.7318	84.1791	35.3751		61.1135	43.8074	39.4331		109.003	42.6616	4.49493
28.7884	65.913	28.7435		61.8321	32.9799	69.533		43.2659	89.1863	99.4155		83.1567	8.94797	15.4605
25.8262	21.0832	24.2034		18.1903	136.656	375.432		55.5804	20.7341	34.9849		7.60052	39.0298	18.511
16.2485	71.5856	99.9409		55.5301	34.7628	129.228		215.433	19.0196	31.553		5.32967	25.7302	20.3369
28.7286	25.8674	24.8046		42.2869	47.4305	32.5199		231.436	18.8307	23.0902		17.7868	22.0259	20.6551
27.4153	22.8207	95.2566		98.5832	22.5453	17.1496		76.3077	125.247	20.4727		123.96	38.9908	209.649
14.5027	16.7799	116.378		37.0553	34.3636	100.911		10.5072	740.225	23.2163		106.475	11.5034	7.43909
118.833	9.75762	11.4959		22.9624	45.7558	251.629		75.8571	108.861	35.5405		11.1382	87.4761	57.9985
69.7246	36.1704	12.243		38.9908	34.8593	23.1786		137.345	56.1828	24.2859		88.9487	6.13329	66.4774
17.9458	83.4752	65.8347		53.6195	14.088	30.7899		34.715	22.2689	81.7524		137.15	14.1298	15.6803
12.682	20.3744	32.7653		25.906	39.0411	18.279		49.0102	722.919	15.9243		18.6772	7.31654	9.70225
11.6379	87.5546	34.1261		212.414	26.5298	88.617		51.3694	119.519	95.6329		9.88557	17.2458	6.03822
13.5326	8.81709	15.616		123.729	50.7878	60.1121		47.1343	205.799	24.8384		109.801	30.0988	5.86612
28.9972	11.8672	78.412		14.2904	12.7423	40.8034		66.0976	54.6464	39.5266		27.2355	68.8023	3.01276
43.186	20.5797	26.1872		52.979	8.73358	107.261		81.9998	35.8971	36.3717		25.2705	98.672	38.5896
16.8576	97.7955	33.4907		26.2384	42.6349	61.8695		60.6417	31.3771	71.2798		2.76786	12.5889	3.74205
34.9268	83.5668	20.1598		91.4257	75.5943	28.5111		94.0247	47.0269	33.6148		22.0083	16.7289	45.3148
151.333	53.6375	12.8237		58.4354	42.0468	16.6522		39.7471	47.2241	31.8093		12.4404	64.3689	8.11506
145.652	48.2531	13.8502		39.415	59.4859	107.29		26.5844	30.041	170.315		23.4049	14.7339	10.9153
51.6022	18.8371	123.095		23.0722	72.8545	41.8152		203.282	38.2293	164.075		28.9025	10.4031	34.0765
59.8454	65.2574	83.5743		36.3799	56.3662	133.141		102.96	11.4033	112.249		11.357	65.4651	31.7118
22.2327	65.1412	16.2407		16.4714	22.8478	94.8373		20.1572	63.7705	29.5542		10.0295	217.918	3.8835
21.2232	17.4696	100.304		51.0413	111.602	17.9391		6.24991	281.247	28.7747		26.1398	4.52325	20.8207
12.4623	11.7071	16.9646		135.788	20.0293	27.5259		34.9004	87.5628	146.845		24.7837	15.7158	61.2439
12.1419	34.0587	130.879		188.539	210.275	28.7099		105.551	49.3945	19.9229		25.7234	17.7025	16.0197
72.9529	15.4316	27.3348		39.3673	45.0129	55.7276		82.4727	13.5084	101.033		143.232	28.1586	10.4166
10.0357	11.3567	108.994		65.8294	20.2158	18.6428		215.717	143.615	14.8697		12.6705	38.3989	205.098
75.052	27.0488	21.2695		18.8366	11.3919	68.4388		25.3401	24.3796	33.9882		20.0497	63.0848	6.26602
75.0145	15.9557	24.9707		51.9777	22.2101	24.6726		49.4378	69.2604	70.8567		198.539	29.0678	17.3383
27.1018	28.1915	82.5269		50.7183	79.9397	188.962		18.8954	29.2172	68.7984		36.575	17.6417	100.751
39.0062	42.2175	27.4477		50.8754	24.0621	26.4961		120.455	137.771	25.6993		20.9184	39.4591	19.0096
40.6577	42.6801	24.2512		119.847	43.459	23.8826		41.2147	132.573	36.6501		19.1095	4.66413	71.266
23.5412	13.2115	13.0743		97.5348	65.2212	27.8993		21.2346	52.4013	51.1846		4.05334	8.75261	10.9855
91.3326	44.1576	23.5598		132.724	30.9448	33.0378		30.8557	170.767	89.3637		53.115	10.9204	5.98019
11.503	70.1287	16.1126		53.7238	65.9375	118.359		129.279	74.6727	75.1219		194.787	37.6122	63.8524
16.5851	78.3951	28.8047		20.178	26.7047	16.551		50.0915	5.96737	146.888		17.6812	4.9788	32.196
26.0605	35.6686	105.715		62.1536	23.5546	24.047		87.2218	83.4157	76.3587		23.8465	21.315	18.5682
27.9079	9.28687	16.9721		59.8469	66.2687	129.159		27.0416	10.7802	262.538		51.2635	20.4897	21.364
8.63237	79.1782	23.3791		10.3532	62.4051	174.107		52.813	63.6302	39.3335		22.3443	33.6484	6.2354
209.227	11.7505	40.0373		34.3837	262.603	36.9378		45.2724	14.319	28.8429		11.4481	28.829	71.5784
98.5844	34.1863	80.4517		26.0901	120.971	27.2187		18.2123	74.7352	194.56		51.8325	6.49414	8.68353
26.4727	25.8343	35.3613		20.7008	30.3838	69.6703		37.6831	20.8651	39.1588		12.1237	49.558	63.1134
97.4005	25.5381	31.5784		28.9174	250.269	42.9033		14.765	12.3559	31.9804		29.9139	59.7017	18.9479
58.1467	16.8811	29.5816		26.162	22.8301	33.1204		151.993	20.3057	38.5633		31.6265	3.86827	5.14166
17.6701	226.237	59.1197		22.9645	43.7409	20.6001		353.328	35.7563	23.1209		97.014	15.3773	4.84609
68.7895	171.195	16.0273		81.4239	66.4712	59.0447		57.4919	35.4958	164.642		10.8283	23.3505	10.5715
158.774	11.8793	17.7601		29.0237	29.678	20.0439		35.8261	52.2103	31.2383		3.73499	18.0065	10.0601
14.3477	28.1771	120.241		17.0079	42.538	79.5369		44.2354	20.1072	32.5256		46.6554	20.9674	26.3143
46.5751	49.7137	18.8032		31.2835	14.6515	59.6146		14.4489	25.0307	12.8284		11.3703	29.8416	211.942
25.7259	13.8633	57.9973		44.7994	131.945	39.3559		21.4675	24.4363	13.2899		8.77063	177.018	46.1214
22.4355	25.8232	25.1612		42.5538	33.558	191.161		43.7475	7.01946	24.6355		290.762	109.063	23.5892
32.9646	55.7678	26.8462			28.1265	33.5874		90.2657	300.111	67.343		45.2819	50.7062	4.09238
17.6273	17.8001	29.5136			28.1352	26.8102		62.8051	13.8688	22.3752		33.8972	185.484	9.7086
22.1197	79.1056	52.5651			62.6913	9.00753		20.0112	332.884	54.9586		13.8478	436.574	33.7149
139.573	18.0123	10.6724			77.1901	95.455		73.2662	22.1336	35.121		10.4992	5.55799	5.6252
20.1666	17.5916	9.71694			42.6223	42.7055		10.6238	28.3858	104.123		18.6047	15.3662	22.8718
13.1313	11.2508	53.1624			57.8511	13.511		43.1719	91.9168	18.3023		25.4791	76.9815	20.0302
19.3937	16.923	46.9038			21.882	7.67447		95.4632	21.2902	56.2092		33.5357	11.0104	6.24912
22.7797	14.891	57.5941			25.0325	114.689		7.01184	21.5218	50.5876		15.6769	119.487	42.1218
19.8003	47.1146	80.5525			88.1345	18.8336		43.7616	22.6782	10.3909		8.59173	9.50742	54.3273
25.604	16.045	16.8715			66.9844	66.7444		15.6512	23.798	26.1144		5.59319	25.043	57.8949
17.8356	42.5406	35.2567			33.6995	28.19		21.468	84.2343	25.7573			13.5999	45.7577
53.5569	35.5161	28.7993				137.9		21.0011	94.3055	132.237			8.6853	16.0663
58.8249	21.0009	149.887				57.3193		67.3301	18.1514	104.093			11.3503	11.802
20.7685	102.768	33.8913				39.6937		129.836	47.3611	16.2027			107.907	12.8963
12.4397	17.229	18.6915				82.8207		145.232	71.1423	613.885			4.26258	145.211
198.032	18.192	38.5213				83.0799		283.491	41.7095	179.063			15.4511	8.25858
62.4802	24.8907	28.8362				31.6427		47.3865	90.7273	20.2061			4.82512	17.0857
36.4446	22.6619	41.3733				112.674		20.9744	26.0057	20.9051			57.0807	11.5292
21.1623	88.2612	23.4359				92.3396		189.496	11.4245	26.6371			28.0993	13.6624
88.8597	14.7226	60.5788				59.9733		155.619	16.3972	30.704			22.9113	12.8702
20.398	158.016	27.9158				36.0339		79.1226	27.5298	50.695			11.7805	97.0299
44.172	52.1206	32.5412				181.358		50.4068	77.0312	23.3359			18.161	102.932
21.7091	8.97486	66.008				46.7268		21.8627	243.099	70.9832			9.88437	5.60642
19.2771	25.2717	41.6866				39.6279		24.9971	43.4142	10.5064			59.591	114.346
17.9261	133.072	22.1569				100.521		11.2172	367.991	159.26			5.24622	5.11092
54.0828	15.2779	169.312						141.481	12.0208	20.1156			6.58198	1.37442
164.202	24.3529	84.3154						11.4485	35.4796	18.6965			11.1505	160.89
12.0165	36.9174	9.99244						36.1742	26.2628	106.741			9.25219
29.227	8.80631	97.566						16.9968	21.659	47.9051			21.3316
45.2298	219.553	60.8092						126.124	13.2298	80.6836			96.9574
69.4274	26.9746	39.8279						16.6533	72.3606	137.007			35.9264
21.3336	18.7909	43.5232						144.29	48.9626	118.797			59.3111
34.6811	12.4108	44.7747						74.3279	25.8293	54.5005
130.338	36.6084	59.1663						14.6683	15.8405	33.298
16.1035	54.8177	25.9441						46.2285	47.7994	20.2133
8.41119	10.2526	22.1919						12.6305	23.4111	38.5456
6.94913	14.1108	24.0209						24.3573	10.8118	27.5006
22.0358	96.5496	9.98297						28.8204	28.4444	28.7251
26.6187	17.2056	9.96091						65.0773	58.1212	11.6382
16.3419	29.9589	37.1774						23.617	44.932	66.1603
17.0928	91.9852	21.0967						98.683	48.1307	133.136
7.70055	27.691	50.7733						50.7944	26.1221	18.4998
58.3859	51.5049	118.014						16.9876	20.3212	26.7334
77.0174	80.3751	225.778						15.9466	38.9509	46.4258
77.5332	44.6967	44.6301						27.3537	110.32	245.509
17.6569	14.536	136.45						62.5533	22.1108	35.6523
13.2302	6.02501	66.5935						58.7974	17.6923	190.146
90.243	182.806	12.509						70.4352	20.9134	78.5473
28.3825	15.5318	75.6355						28.431	57.287	16.2848
12.6293	88.5799	36.5358						18.6318	41.5552	20.3422
23.4842	20.8464	76.2789						45.0327	120.261	36.0177
17.722	29.0705	11.8999						551.915	118.596	106.003
36.0529	11.3934	17.1992						13.8788	43.2843	57.5276
51.8697	11.309	21.0881						55.9056	602.691	35.4915
36.1039	162.108	137.989						25.0362	48.7514	72.8595
39.4305	11.4798	61.7997						59.2203	28.6852	106.679
33.3609	63.8646	136.167						41.936	25.9618	14.9591
10.8051	26.0159	25.7576						47.4595	44.0411	16.7996
26.0367	17.8357	38.9312						67.0279	11.7225	110.791
11.8607	47.9884	102.397						13.5493	43.8833	47.7107
29.9384	23.6636	20.6642						93.3164	74.0185	33.4834
11.8194	27.2073	61.8009						37.1249	25.3193	16.6908
58.6416	30.3505	32.3963						240.683	72.6508	21.9739
12.612	112.196	75.8123						44.8083	51.528	33.3484
29.1665	33.563	23.2117						107.647	124.618	58.5521
55.7231	13.0387	26.1028						30.0475	392.119	245.354
19.4845	22.4855	67.7191						15.7687	223.88	12.4135
16.43	8.97881	20.8371						61.9288	12.1473	46.7499
88.4411	40.0404	13.5839						18.5289	35.7736	121.476
23.9844	19.7105	14.8173						53.6998	71.8806	50.0997
94.6693	61.8195	22.8514						13.4724	31.8279	157.161
91.7504	21.3206	29.5843						73.6714	83.7254	58.5615
18.4681	20.9382	19.0592						25.2676	137.023	37.0585
63.4403	21.3692	31.5074						26.947	15.6656	17.6682
27.0297	17.8188	7.36001						28.7009	65.2103	41.3978
28.7984	13.505	45.4959						19.8551	23.388	52.5173
21.9786	26.6014	19.4027						47.1116	15.0381	41.237
21.0684	23.7807	27.9585						36.6827	39.4579	46.0602
24.5472	27.7926	23.8901						14.4131	34.7056	78.2608
15.9175	23.3197	15.4891						135.733	110.844	55.2236
20.5992	107.348	42.4829						36.9686	28.1001	26.6454
26.2753	124.88	26.98						32.4008	17.9009	36.1177
87.3051	13.6829	21.8786						127.167	129.679	14.1685
19.8578	53.5937	38.5914						59.6203	76.7625	30.1353
49.6051	52.2026	17.2987						47.9946	104.667	122.621
23.4565	50.0365	21.5315						11.2402	278.736	56.1903
71.6559	143.877	18.2329						128.55	74.9759	72.0817
156.107	10.7633	23.5061						88.6171	94.1467	121.307
15.835	135.478	34.9502						64.333	38.1256	22.5424
11.3622	41.4272	32.5516						30.2306	47.4376	82.4673
5.62132	29.8086	13.5058						30.4665	23.4324	95.3015
46.3148	83.3932	12.9934						159.714	31.3011	21.666
24.0212	20.2531	26.3495						38.0836	18.3513	1263.65
42.542	32.1751	48.9443						106.926	66.5164	37.197
53.8927	21.5735	26.0205						20.8101	29.2282	16.4527
87.2692	25.8318	26.2107						173.153	29.7764	47.5171
14.7116	95.4412	15.9818						54.0312	15.6279	21.9481
56.1606	15.4618	103.897						29.7964	7.89054	34.864
22.2983	125.668	29.8908						189.94	143.598	23.1956
314.425	11.265	37.7651						69.9836	49.351	14.7732
19.6076	24.0295	18.2209						17.3531	30.7591	21.8742
12.7984	21.8752	9.82734						207.105	61.7037	9.52437
33.5444	37.6303	25.632						95.2268	30.2191	82.0795
13.9735	10.9293	50.9387						37.8229	51.8974	140.722
44.68	26.6719	14.4217						42.0974	18.9179	17.3806
28.9462	39.8314	14.0839						139.605	718.719	21.4099
14.9835	16.555	24.0259						21.9588	15.8389	57.8538
36.7171	14.37	29.0075						54.4038	55.1314	62.044
22.4317	15.8191	24.9864						25.8748	222.263	104.343
18.0899	16.3049	94.3112						135.542	44.8011	52.1634
28.8633	16.6674	12.5238						27.2361	38.1788	18.9739
9.09926	76.1431	15.1061						145.784	59.4594	43.5745
54.9306	148.17	14.2351						23.8818	50.3637	696.106
55.9358	48.6499	62.4023						190.667	46.4348	26.0159
140.627	95.6628	11.2695						10.6687	14.4688	76.1538
29.1663	62.4012	157.071						17.1624	55.2179	53.4231
32.4666	9.07171	59.5984						61.4466	18.9893	26.1394
19.5024	20.8883	11.8855						143.38	17.2048	11.9363
18.6005	24.7303	58.5484						70.2078	46.5862	11.1421
25.8054	71.1936	11.2218						41.1252	62.4659	16.0268
45.2192	24.0277	10.6686						31.0117	75.823	72.9614
11.5317	30.2393	69.2583						83.924	23.5774	68.6264
60.578	16.4412	258.981						37.0172	25.8133	17.7275
28.3631	9.26213	20.3756						28.4447	135.543	79.1744
14.1013	16.8913	183.014						81.1898	385.713	35.7351
29.211	124.985	32.3559						20.5583	18.7623	139.682
78.8361	23.8692	33.5686						32.7713	166.444	196.23
70.4354	51.79	99.3809						64.1861	85.1879	43.6953
14.637	23.195	10.1605						27.5882	90.7545	36.812
11.4755	39.5444	77.689						97.1295	42.8447	42.0433
68.7215	20.8391	176.964						9.26389	189.88	93.3427
38.2543	15.0384	15.7734						91.2844	20.0622	13.5075
9.24002	55.2795	12.0626						21.7532	134.266	43.4016
17.5549	80.3477	20.0398						93.4822	31.3302	24.4116
14.3771	21.6022	19.5482						49.8283	15.6636	94.6659
9.75644	51.7995	46.2275						79.1716	73.0481	21.6722
40.5395	51.4835	67.3708						26.1536	14.2561	358.955
136.113	18.3689	22.3179						18.7157	41.0456	23.9366
53.4161	9.57354	41.7939						92.2746	33.6605	40.5001
35.2464	68.4322	16.5206						31.5248	21.1048	32.1211
45.2695	41.0698	25.1175						24.7444	25.6114	30.7137
19.0149	46.932	42.1064						359.042	32.3161	23.1936
17.4579	52.3214	15.5711						53.6978	78.2695	98.4189
37.1564	28.1323	26.84						254.682	30.4831	33.9418
39.6618	43.9499	61.4774						64.1438	22.3649	30.859
17.9895	35.8594	59.03						13.1432	919.621	18.0684
61.6535	39.5025	43.3995						53.3134	225.268	146.307
19.2478	91.9423	46.1311						137.784	23.286	122.721
52.5606	90.7305	53.4808						60.7336	30.5446	47.6842
12.0977	15.5741	143.451						50.9012	128.844	45.0094
51.9961	50.77	26.8786						102.519	6.29213	181.377
17.1072	53.4789	48.1119						115.383	39.4603	86.0333
33.3936	118.966	58.9204						24.6353	187.836	19.4172
36.2904	16.4084	50.5074						32.3333	12.8225	28.9777
18.7161	74.1609	33.4174						15.1903	111.487	22.444
74.8426	22.1218	22.3457						30.9196	50.1213	25.8805
25.4912	191.867	19.5812						375.91	29.481	12.5584
13.0724	11.4983	32.2456						31.6063	13.0854	73.3611
22.0146	79.0393	79.6316						35.6521	21.7253	34.6886
8.71726	62.5946	25.7811						172.265	76.8875	21.851
20.1851	16.0169	45.8793						16.9893	27.6403	85.5966
55.9732	98.8571	21.4492						105.38	12.0685	27.3833
37.0996	19.6439	8.89947						42.292	68.7039	62.1623
19.3342	13.3229	25.5621						17.1755	26.3018	30.1877
28.9296	14.2174	22.0174						96.4932	122.744	77.8887
32.1713	10.1239	26.7105						188.397	47.6084	127.694
24.5409	16.9602	31.5421						39.0493	483.382	14.7565
25.0154	32.5792	139.31						147.935	27.4999	87.7159
106.554	15.7507	15.7392						98.3562	23.0983	109.959
13.7631	23.2816	82.262						55.9765	18.4287	103.935
236.076	15.0182	17.0711						149.841	23.4577	12.866
38.3176	13.2695	25.2618						96.0484	41.147	62.1675
127.964	15.1066	23.7571						52.5558	303.474	45.3712
30.7162	21.2198	20.935						16.0883	39.3891	132.448
44.5996	65.5091	7.04782						25.5671	168.607	216.021
60.438	83.5411	11.2971						47.0347	39.9337	56.588
34.5299	88.9158	91.7132						46.0408	198.632	281.145
36.443	42.8422	19.0069						115.687	98.1161	25.4835
23.8972	22.0758	17.7305						18.5752	14.3999	117.312
55.0946	26.4416	11.0926						75.4057	131.443	35.1427
183.276	16.1328	32.867						105.102	69.2481	55.2554
51.5979	21.0342	34.5508						20.9351	26.0538	28.3812
185.808	41.1827	50.5851						25.0899	59.1817	161.784
23.1763	25.7432	196.879						17.3685	36.8888	15.0907
108.715	58.0063	112.35						98.1278	32.361	58.7791
12.5313	17.0264	23.6351						37.4342	144.382	21.5824
63.044	6.82095	78.9739						31.657	314.69	40.2785
60.6306	16.5574	34.5967						90.9668	45.4608	105.366
25.0015	26.1515	19.9772						38.2556	90.0729	97.1243
28.1589	19.5684	23.8525						40.7713	16.7699	34.8983
15.086	25.5011	12.4024						19.2771	41.1016	109.873
24.6636	114.882	42.9564						12.937	90.4351	25.6292
41.6145	121.073	71.0648						21.9046	355.771	33.9283
22.9284	48.5332	79.3286						67.188	17.4535	22.3086
51.0846	38.3091	43.563						78.9373	29.122	40.7533
33.6269	19.5842	24.5366						46.7286	311.877	405.565
84.5456	34.2903	39.8627						50.1187	87.9638	56.3585
57.9873	64.8497	92.5074						20.245	47.8816	29.727
12.4629	19.9721	32.3032						128.747	24.3225	29.5044
30.8645	15.831	21.3513						23.5252	58.2493	128.285
35.0938	25.425	115.797						15.664	26.9188	24.5412
159.087	15.0475	132.053						51.3231	25.08	68.8692
25.8025	137.077	13.2553						25.418	61.8463	357.837
62.6972	20.245	22.8167						132.117	28.0488	37.7341
85.0115	15.4167	30.6266						1000.84	45.2369	25.2482
37.3436	174.965	20.258						91.0363	57.0862	263.777
52.4875	49.0919	35.8085						1009.99	87.7517	50.468
18.2734	108.771	20.1911						39.4725	37.8509	40.2505
42.1207	43.5202	90.084						34.3663	14.7946	235.931
17.1792	93.0537	25.0212						287.055	26.7658	49.837
32.8915	37.9864	66.0688						65.1278	40.1676	77.0293
48.9131	19.7477	23.4429						43.839	24.8801	208.74
144.346	22.4429	61.0476						10.5376	50.0212	37.521
21.4961	14.2253	12.2749						12.9807	127.193	31.5825
28.7519	15.4873	29.6185						16.7533	203.146	21.0115
19.0156	27.5709	18.7883						91.8658	71.8151	91.1099
21.3874	29.8416	28.3808						34.0682	93.4112	15.4231
17.3964	39.5694	37.8302						11.7155	48.4495	144.21
78.4612	87.8328	9.97175						97.2918	20.1833	36.0298
53.041	96.7708	21.3927						31.3865	24.5551	124.234
97.6016	41.213	25.6022						60.5801	29.1956	33.8496
117.862	81.8655	28.2145						56.7775	30.2289	18.8497
25.1527	146.227	11.2164						50.8357	405.771	33.2608
26.0468	40.7179	13.66						13.8445	270.563	85.7029
46.221	25.4033	21.951						63.3939	30.6298	34.6552
22.4146	17.2083	108.654						136.317	23.6028	19.1776
42.0676	17.9279	39.0054						38.3766	168.638	29.3478
25.7492	27.9296	63.2851						16.4665	74.1591	18.5875
78.1633	11.041	52.9799						27.7239	19.6729	213.653
22.2025	46.0108	9.1299						75.0095	20.8588	159.578
36.0628	67.5199	34.6622						75.1738	403.134	29.0998
33.0884	278.109	11.5447						74.1061		215.378
122.885	109.119	94.8228						21.7138		26.432
16.3117	33.4094	80.7972						20.3142		178.314
79.8775	10.3048	37.741						15.016		113.313
83.3589	12.4916	26.7556						74.948		42.4605
64.5839	19.1608	17.3418						23.8216		37.7807
76.6021	27.2687	41.722						30.5549		98.013
36.8502	24.9333	63.1184						117.143		26.5419
26.1861	57.9044	27.0847						162.151		82.1981
17.3676	42.1714	26.0456						48.2432		36.5504
56.934	173.048	88.976						39.7065		26.7114
15.9751	13.0395	18.448						17.9312		69.873
42.9099	26.346	27.25						52.6317		56.2769
21.4488	151.135	22.154						74.1156		339.138
75.9001	73.9751	161.897						98.8476		64.8471
22.5482	38.5367	12.7909						50.0034		71.9406
19.8298	21.5955	52.2091						28.1918		62.1552
68.2277	38.7308	17.3503						96.1804		114.991
21.7851	70.9926	128.28						25.4145		38.8159
135.573	12.0052	13.4699						108.489		109.019
33.8403	21.4018	83.894						20.4478		84.1804
25.2932	29.7705	25.1939						41.4252		51.5499
40.3397	145.179	220.705						42.9247		49.2973
286.835	17.7754	32.3217						19.0329		34.7176
70.568	71.867	17.6479						30.2606		11.0587
50.8204	68.0312	90.7839						7.31121		28.3191
16.502	81.4099	54.0705						30.5338		19.448
29.4622	39.2592	66.6181						101.395		39.9442
15.2234	62.7959	8.69892						130.142		96.5052
22.4008	30.574	20.75						95.9296		116.418
24.5564	22.077	13.1705						12.4164		175.762
119.142	67.5188	17.289						31.9808		10.4889
56.2679	30.9917	11.8781						29.8363		17.4572
12.814	224.225	9.78726						18.9311		25.434
19.7095	77.8155	22.9263						242.695		26.8876
21.1098	97.6123	19.5905						35.301		116.73
11.3369	223.17	51.9997						19.4239		29.5514
18.0444	43.789	33.4022						106.836		14.011
22.1219	84.9895	25.1151						44.5047		88.5932
43.0997	14.9987	14.0172						48.5267		99.7657
49.0208	13.6334	24.0754						15.217		66.3474
90.2532	18.9137	22.8497						47.4565		107.494
79.6146	87.9056	14.6772						28.7183		19.7907
19.6873	20.6218	23.5105						71.9642		248.076
28.5136	35.6103	126.94						167.782		19.421
72.2854	70.755	58.9084						86.2139		36.9608
23.8625	23.5631	13.2443						38.3578		408.382
8.32604	32.9291	55.6489						97.8093		175.051
32.3917	55.7213	51.2758						48.8221		120.959
86.6218	21.7543	19.7768						31.4906		50.7334
19.9802	82.7242	13.4401						22.4382		35.3585
14.1227	40.9495	25.2083						96.5099		76.4326
68.2659	29.6118	22.7847						36.6475		88.5768
69.636	14.2695	12.4799						51.3192		10.3725
19.5219	15.2173	16.2962						64.5816		74.9274
20.9142	57.1241	17.6909						10.3984		115.427
15.9577	15.0698	23.8911						42.5059		56.2637
32.2144	19.3129	28.1551						54.8513		35.7881
24.5342	13.9978	63.7768						55.8413		10.7916
105.514	46.245	29.9314						48.4197		54.269
40.7501	47.4845	23.1501						299.275		120.096
16.9797	12.8089	31.4032						98.7697		28.155
31.0751	127.096	23.3472						19.0122		49.5692
35.4331	27.4027	43.2373						14.2135		33.5997
40.5587	40.5129	23.967						83.2545		13.9861
69.8627	21.1587	16.9863						23.0989		14.3808
31.5177	19.6828	28.0589						129.334		14.0696
37.25	17.8114	22.9446						33.5402		121.995
29.1124	75.4004	6.98899						41.7139		30.029
9.91643	14.8893	68.0811						17.1401		88.3705
24.2435	68.638	13.6541						41.0044		18.7206
18.307	33.8025	26.541						12.668		602.527
107.361	10.6274	26.3387						24.9471		228.578
17.4395	59.4795	24.7378						175.66		34.6755
81.5726	76.935	130.989						160.854		55.7139
63.2971	24.8177	11.1019						46.6835		70.7606
21.2206	38.1312	26.332						28.6555		48.7865
11.2078	111.37	93.085						65.3307		22.6692
34.5526	12.8816	22.2844						22.0887		32.1705
143.684	83.8025	22.353						35.5334		144.921
170.054	34.0822	157.942						42.6349		106.143
11.4648	51.4064	102.975						21.3245		32.8608
41.3398	14.7038	14.6249						27.2749		33.0126
73.6507	22.2493	22.934						42.024		171.643
41.029	21.5595	33.5628						41.783		30.4421
106.582	16.6704	90.7126						35.6774		27.7125
35.4012	16.3687	13.4086						31.5055		24.5466
13.0778	13.0123	70.4251						59.7369		28.5686
37.1236	28.4574	23.9849						68.8521		14.9809
11.2906	43.912	143.032						106.302		65.4206
37.0627	34.0474	22.6214						28.6384		142.685
9.00849	87.0265	47.2728						29.3155		17.211
20.4465	24.8124	150.415						21.5836		20.8015
44.9221	26.7829	172.949						21.0832		44.8374
41.1076	12.9049	29.0585						103.502		13.9992
16.6424	84.9725	18.2864						32.2877		41.4739
71.353	20.7519	21.8533						29.3241		40.6986
94.3096	20.0691	20.6423						13.5633		92.9669
95.8355	19.6285	71.5906						20.122		30.4679
22.1545	22.3833	18.903						32.04		95.9856
16.2113	7.23651	24.5616						15.5163		24.6909
88.3685	13.5362	35.7222						42.2849		33.3489
8.01654	17.0144	10.3497						45.7115		34.4599
53.5185	29.9845	80.5165						114.272		19.382
76.0632	35.9162	29.3931						21.0017		41.0682
19.9757	21.1091	62.3043						77.7951		12.8799
24.2828	127.893	67.536						53.4859
83.6037	22.2892	62.9277						13.5204
26.2282	102.659	41.6591						21.6571
21.3225	12.2982	83.775						44.4606
9.4056	75.8076	217.197						31.1553
42.7885	93.2342	25.735						70.779
48.1588	18.3116	46.4011						14.4374
17.4453	18.9992	18.0009						13.6265
24.2821	25.5419	28.0844						26.6149
33.0979	84.415	142.744						35.1003
19.2272	91.7415	14.5241						79.6245
7.75294	16.4236	13.491						25.5297
23.6903	30.6339	37.8959						13.142
24.4374	37.8693	67.5353						65.2572
57.5307	93.1477	23.8938						27.4048
23.7017	39.1757	36.7262						41.8494
23.8723	38.3305	23.143						17.429
36.6646	147.753	34.1018						51.1795
114.9	70.3033	24.8679						21.0058
25.365	27.5447	70.1499						176.903
21.5675	99.9377	19.1						86.746
47.1117	30.8914	24.7064						77.1725
111.904	16.4033	85.4806						45.2117
145.047	121.791	16.0517						54.3572
48.1303	28.4477	7.83315						104.446
36.9587	15.332	24.7067						19.9864
111.874	23.557	25.6859						204.092
70.5105	23.1971	44.9541						30.8028
14.3768	15.5336	23.5557						21.3851
55.6686	28.3079	9.51412						30.4696
72.017	43.3735	9.56106						105.527
49.494	9.3048	35.9693						371
16.7879	142.429	12.9006						15.2226
67.9603	88.7537	54.1717						32.9431
38.2165	38.973	20.2617						148.691
26.6648	22.924	29.2195						29.3872
21.5218	169.69	376.227						14.8059
85.3534	24.685	16.4877						44.8991
27.8379	14.9774	12.6506
189.763	22.7974	137.506
27.078	37.9841	17.8224
16.9235	21.2797	30.102
44.8027	51.9113	20.9304
32.1285	16.2797	19.0995
153.52	26.0424	125.014
57.6754	52.7572	18.7144
22.013	80.119	47.0251
11.7622	34.9639	36.7421
19.9487	17.6239	32.8776
20.3292	21.3121	19.8874
27.273	5.79806	77.872
11.3274	7.9858	8.76042
13.9806	9.6849	68.3266
27.9168	33.5124	22.887
20.8655	20.1072	170.676
41.706	74.0062	16.7251
31.8127	11.4994	18.2423
25.1202	37.1259	46.9728
21.5505	17.8914	39.9123
19.4599	64.306	132.322
11.1094	15.8313	28.8004
5.08686	14.5134	11.6996
19.8018	20.7002	69.2571
21.0823	24.2227	9.14162
22.916	25.8816	19.5838
28.6411	54.7428	147.883
46.1702	46.5702	19.26
78.487	115.579	8.30066
7.70099	19.8006	61.3496
40.5759	23.196	153.778
38.2524	8.01014	28.4313
89.9848	21.838	26.4046
25.7686	56.4196	10.7733
84.4066	80.6095	70.4603
11.9642	29.3721	11.8437
117.364	33.1113	52.4754
16.7815	9.58842	53.9729
82.7669	32.0025	9.0881
11.0881	29.5893	54.257
13.3347	15.3502	27.0586
10.5126	192.33	86.7503
58.9636	21.0085	20.9119
30.0377	20.5098	28.7347
10.0311	25.0994	66.3637
14.142	12.3564	208.627
40.4514	50.0864	60.1324
26.1199	154.165	40.5929
19.5862	91.1746	20.2943
18.9513	36.497	178.202
54.5503	30.7402	21.0571
35.7857	41.1161	64.3175
9.42985	85.3779	15.0343
71.0769	79.9979	39.2703
15.7057	58.8362	31.0522
28.032	9.78554	41.9436
14.5927	23.7311	164.892
11.3337	51.6348	259.32
20.6674	23.0979	16.9323
48.6203	21.7931	11.3415
24.6168	21.8718	55.3619
93.959	22.0955	49.2075
18.7714	20.6171	79.129
36.24	69.5304	25.138
38.8391	134.784	15.7538
36.0919	225.306	24.3868
24.363	20.3508	50.1313
19.951	215.532	32.0109
60.9912	9.56732	17.4282
15.8938	11.1945	65.275
10.141	29.227	54.4529
30.606	30.7859	13.0742
50.0196	216.265	10.8789
98.5205	9.50727	14.8862
40.2206	12.6963	58.5715
19.603	24.376	34.0027
32.5951	27.6969	37.1969
37.2441	22.0551	85.4916
141.923	21.1396	21.7354
12.3754	64.7385	67.6043
54.0289	132.282	25.3237
16.4445	20.1711	10.6592
230.82	182.514	15.9786
16.0685	36.1642	15.0108
61.4414	21.0419	189.276
10.9411	18.0039	14.3022
61.9262	71.1603	32.6026
35.3533	20.276	21.9937
24.5699	10.6684	26.8786
52.0603	23.3411	26.9587
29.2149	13.1702	22.7977
58.1971	45.2276	207.38
62.0916	39.8757	39.3022
23.0958	34.1253	99.5425
23.0326	57.595	29.6923
77.7442	34.1679	54.898
24.484	7.77143	43.5887
25.641	27.2055	27.9991
20.1387	24.7909	18.2012
8.48385	30.2384	125.827
11.8302	18.7949	83.254
22.7656	25.1599	18.5751
46.9024	167.024	29.8307
86.6527	19.9248	16.689
99.5274	55.4744	18.108
44.1795	16.699	35.5175
23.3233	20.3063	48.4854
15.2032	19.3597	101.77
14.7319	50.079	130.771
21.6827	16.4645	60.4635
40.7272	18.1245	17.2474
20.1667	93.6333	66.9585
111.216	22.8394	141.157
54.203	29.4325	10.2192
19.0224	20.4143	72.187
87.4727	15.7163	12.9754
112.538	21.0204	42.2955
16.9355	13.5283	14.8242
20.5365	24.003	224.065
163.961	11.225	19.9347
49.4177	23.5046	13.0115
47.6033	9.31976	19.1893
19.8313	24.927	58.6181
38.7245	39.9545	11.8424
15.1881	37.3598	42.9337
25.6606	84.677	24.9236
28.2354	13.9755	65.1537
12.1214	117.707	18.9298
24.9236	98.6886	13.3322
17.6323	13.6683	20.8944
14.5647	13.0727	28.378
34.927	7.48802	41.3794
84.8888	126.67	20.5384
20.738	29.464	46.8556
41.0387	45.2081	10.7608
30.9219	22.8562	53.406
118.538	24.8874	26.2608
20.9181	10.407	55.8532
36.3193	17.2285	28.6643
172.955	23.9452	20.1101
16.7579	42.5913	27.3779
21.9024	28.3052	45.142
9.46896	6.83249	28.8024
21.2549	19.5287	22.0594
18.0949	87.6747	31.1483
26.0699	28.636	7.63145
76.5611	12.9395	23.5541
12.3152	24.6707	70.3989
16.2474	25.7279	29.722
27.506	34.9403	14.3903
72.2325	27.4552	27.6551
137.739	49.8522	9.2934
144.8	22.5832	18.4119
47.4231	8.31509	35.7929
98.3007	9.29912	23.2685
162.001	24.9232	28.7934
30.3197	110.742	24.0822
85.5931	13.0462	82.3722
34.8039	27.7935	19.6042
23.2992	14.6051	28.73
87.6152	17.4071	17.2819
9.83411	72.7407	9.72061
7.69495	22.6747	28.9461
95.9837	98.7041	14.2159
19.7452	68.911	25.0191
109.882	23.0512	23.1944
26.8246	59.9755	101.57
36.1967	84.8704	29.5531
15.4923	57.2103	200.418
31.0906	27.8505	20.286
10.1546	21.1	56.5494
27.6949	17.1333	87.7289
24.1508	27.5365	11.356
16.2227	38.7037	10.3618
41.1011	49.0789	74.3495
16.3649	29.3924	17.0031
28.1484	23.3046	63.8666
32.0042	30.8146	16.2612
12.5248		19.4052
32.8507		24.2994
52.7064		80.7614
29.7003		18.6496
89.7534		161.997
55.2537		25.7559
9.11645		17.7628
96.8165		37.3941
18.0884		5.86018
31.8133		12.1516
93.5594		19.8624
46.8168		89.1933
25.5126		12.1838
36.8489		25.0754
14.5513		35.3066
33.9556		20.6857
39.2887		35.7797
17.5737		9.8098
19.5978		31.3575
79.4392		13.3133
15.4218		187.626
19.2909		125.101
19.653		91.8868
37.6189		10.6475
212.236		15.7092
45.4181		125.213
28.1021		22.325
20.3094		26.1347
20.2513		27.5918
36.8607		21.66
23.4426		20.4871
66.6604		21.6816
53.8247		31.283
10.8873		17.6374
27.9873		36.959
96.7958		21.9305
11.5359		23.5569
27.7426		16.1339
67.4032		61.3294
9.33093		14.559
65.1843		66.7877
16.3939		17.3397
18.8625		23.2216
14.4013		94.5369
13.9134		12.03
105.154		29.0336
32.3282		186.546
93.4976		14.4626
49.7119		28.2495
88.7568		23.1684
13.8037		26.0004
12.5992		90.2421
57.9675		24.2743
24.0397		62.2096
26.0891		95.8045
29.0252		32.6258
12.3069		25.8551
36.6384		52.9235
18.1451		113.442
20.8596		43.7955
37.9328		42.5174
35.4453		17.0572
101.244		53.4085
38.9793		31.0222
24.9938		75.4849
32.7922		62.246
11.547		45.668
48.8		18.7676
25.5864		13.3081
27.0398		26.1462
20.4083		14.5852
45.3433		34.0751
51.6647		10.0786
19.241		22.1018
41.0346		25.7421
130.746		23.4475
22.7257		24.1066
8.90737		33.3528
109.667		12.3973
30.2656		23.9511
60.5952		15.4978
36.0067		19.8371
30.1818		20.2728
14.2874		16.5579
17.1927		94.4395
10.5253		57.4613
36.8014		6.12089
41.1977		28.2432
29.5407		29.5651
194.95		12.2291
21.9291		21.4745
8.81167		14.5854
19.7548		15.9192
13.9218		20.185
247.899		17.4507
43.4555		107.847
55.616		167.299
24.1537		29.9979
12.3968		121.591
27.815		25.2007
26.2552		190.836
29.4014		22.3971
11.9313		149.865
63.3289		26.8326
16.9816		7.95367
37.0345		33.2599
18.6351		100.347
22.3028		87.7716
15.57		129.724
20.8225		11.75
47.624		17.6413
60.7239		62.4083
38.092		57.5995
5.23377		9.63136
22.3523		31.0392
13.7573		27.4459
24.3452		34.5309
41.3463		23.5322
20.8939		60.3488
24.4929		47.3374
17.9438		44.8476
52.5909		11.8439
50.3291		85.7055
4.89061		21.1206
25.153		19.2723
48.4911		25.7863
221.535		19.9227
50.4169		16.6359
13.8392		12.9429
57.4849		6.4314
95.1348		28.269
31.0057		21.4101
156.523		28.6679
131.295		17.9708
6.60821		27.8881
7.90914		48.6905
11.9651		34.4917
81.0016		16.5381
22.8058		42.23
67.3203		11.1807
109.302		31.4735
12.1918		14.6094
42.385		28.3896
87.3812		153.675
20.9389		25.5007
18.9025		17.7073
34.7639		26.5728
22.8372		21.5109
21.8302		22.3546
19.7752		34.6678
27.4134		27.1262
22.2012		23.7824
13.1641		41.627
17.4219		26.6043
60.0273		26.6272
49.7376		53.538
22.941		27.9652
23.2475		49.4783
20.467		18.8504
25.1977		17.419
20.6146		18.9891
79.432		21.3277
22.5117		16.4416
30.7834		14.3544
28.7691		70.2608
29.2636		204.931
17.9797		18.4131
10.2316		86.1606
34.6581		38.9076
186.099		51.8058
57.2861		3.8368
20.3985		86.6789
61.9957		123.668
25.813		37.7297
115.605		24.961
13.222		12.9699
185.519		155.932
37.6827		21.4146
6.27551		37.0319
36.7738		25.2813
24.4961		59.1716
11.6047		32.4438
84.9876		17.066
84.8431		249.308
20.6395		17.4833
87.8214		25.3229
19.8636		119.338
9.87457		47.6841
136.214		21.5226
18.5453		34.8206
53.6022		42.6216
23.2358		26.9265
55.7366		123.27
59.6388		40.9912
51.445		21.1582
21.1598		36.7802
64.9206		30.436
179.13		153.946
		24.5469
		43.7152
		16.8686
		56.2194
		74.9156
		29.037
		9.90588
		18.1611
		239.439
		13.6663
		32.1292
		9.00741
		87.0209
		103.025
		69.7638
		89.9647
		10.3837
		69.1021
		17.5975
		18.0949
		18.5706
		354.498
		12.3095
		34.7353
		95.818
		10.58
		14.6556
		20.1449
		23.1347
		58.6344
		19.2888
		34.0853
		19.9736
		20.6708
		108.517
		12.501
		12.2005
		35.1883
		56.5338
		36.7959
		91.9974
		80.1544
		47.1718
		40.9275
		122.439
		10.8827
		24.1313
		98.515
		15.9318
		28.9307
		97.2005
		58.8527
		60.4466
		21.5518
		59.5444
		123.995
		42.8514
		23.9744
		115.224
		15.9451
		29.0367
		30.4141
		44.1469
		68.299
		23.385
		18.2841
		37.4814
		29.142
		19.5575
		13.0252
		24.9093
		27.4977
		68.5282
		17.8392
		29.4088
		16.0461
		23.0806
		24.033
		12.0312
		158.494
		45.3791
