# Supplementary material for: Crash landing of Vibrio cholerae by MSHA pili-assisted braking and anchoring in a viscoelastic environment
Source: eLife. 2021 Jul 2;10:e60655. doi: 10.7554/eLife.60655 (PMC8282333; doi:10.7554/eLife.60655)
Supplement: Figure 5—source data 3. [file elife-60655-fig5-data3.xlsx]

## Sheet: Figure 5e
	in 2% LB only	0.8
	in 2% LB+1% MC	1.83
	in 2% LB+20% Ficoll	0.75
