# Supplementary material for: Crash landing of Vibrio cholerae by MSHA pili-assisted braking and anchoring in a viscoelastic environment
Source: eLife. 2021 Jul 2;10:e60655. doi: 10.7554/eLife.60655 (PMC8282333; doi:10.7554/eLife.60655)
Supplement: Figure 6—source data 1. [file elife-60655-fig6-data1.xlsx]

## Sheet: Figure 6a
		Shear rate	Viscosity
		1/s	Pa.s
		0.00997	16.7656
		0.01583	27.0833
		0.02509	33.7353
		0.03981	35.8056
		0.06309	30.939
		0.1	19.098
		0.15849	9.41945
		0.25119	4.69083
		0.39812	2.3157
		0.63098	1.54774
		0.99999	0.94409
		1.58487	0.64966
		2.512	0.5051
		3.98111	0.4188
		6.30945	0.33936
		9.99995	0.27568
		15.849	0.23466
		25.1189	0.20067
		39.8107	0.17396
		63.0956	0.15321
		99.9999	0.13616
		158.489	0.12091
		251.188	0.1068
		398.107	0.09339
		630.958	0.08053
		1000	0.0683
