# Supplementary material for: Crash landing of Vibrio cholerae by MSHA pili-assisted braking and anchoring in a viscoelastic environment
Source: eLife. 2021 Jul 2;10:e60655. doi: 10.7554/eLife.60655 (PMC8282333; doi:10.7554/eLife.60655)
Supplement: Figure 6—source data 2. [file elife-60655-fig6-data2.xlsx]

## Sheet: Figure 6b
		Oscillation strain	Storage modulus	Loss modulus
		%	Pa	Pa
		0.00219	70.577	35.3484
		0.00369	89.9814	33.3572
		0.00676	79.4985	8.54452
		0.00937	93.4474	4.42763
		0.01639	84.958	20.6179
		0.03037	48.0636	23.7791
		0.03912	51.1253	21.3841
		0.06842	41.4679	18.0031
		0.11169	29.6201	19.0501
		0.17689	22.1286	13.4678
		0.28299	16.3672	10.8983
		0.43006	13.3839	8.59141
		0.68735	10.8923	6.42993
		1.09788	8.49296	5.00714
		1.74504	6.2576	3.96495
		2.68245	4.80386	3.16064
		4.19245	3.71549	2.44071
		6.59149	2.90261	1.86007
		10.4382	2.10678	1.40999
		16.3898	1.51516	1.08508
		25.7354	1.0805	0.85173
		40.5816	0.73158	0.66702
		63.7915	0.54209	0.58202
		101.21	0.33925	0.41872
