# Supplementary material for: Crash landing of Vibrio cholerae by MSHA pili-assisted braking and anchoring in a viscoelastic environment
Source: eLife. 2021 Jul 2;10:e60655. doi: 10.7554/eLife.60655 (PMC8282333; doi:10.7554/eLife.60655)
Supplement: Figure 6—source data 3. [file elife-60655-fig6-data3.xlsx]

## Sheet: Figure 6c
		Angular frequency	Storage modulus	Loss modulus
		rad/s	Pa	Pa
		0.05	11.633	1.99319
		0.07924	13.7325	2.5368
		0.12559	16.0113	3.12706
		0.19905	18.3642	3.79069
		0.31548	20.2897	4.44871
		0.5	22.1222	5.08149
		0.79245	23.5806	5.70359
		1.25595	23.9547	6.32675
		1.99053	24.4058	6.93127
		3.15477	24.9291	7.50451
		4.99999	25.3966	8.01369
		7.92448	26.4081	8.42264
		12.5594	27.777	8.78342
		19.9053	28.8923	9.1932
		31.5478	29.6951	9.75516
		49.9999	30.1147	10.5641
		79.2435	29.8983	11.6361
		100	29.6476	12.3932
