# Supplementary material for: Crash landing of Vibrio cholerae by MSHA pili-assisted braking and anchoring in a viscoelastic environment
Source: eLife. 2021 Jul 2;10:e60655. doi: 10.7554/eLife.60655 (PMC8282333; doi:10.7554/eLife.60655)
Supplement: Figure 6—source data 4. [file elife-60655-fig6-data4.xlsx]

## Sheet: Figure 6d
		Shear rate	Viscosity
		1/s	Pa.s
		0.00997	2.46725
		0.01584	2.71729
		0.02512	2.02163
		0.03978	1.59979
		0.06313	1.42275
		0.10008	1.29662
		0.15843	1.15832
		0.25121	1.09612
		0.39811	1.04664
		0.63096	1.00549
		1.00001	0.97428
		1.58495	0.94211
		2.51189	0.90849
		3.98096	0.87001
		6.30962	0.82353
		9.99991	0.7676
		15.8488	0.70717
		25.119	0.64234
		39.8107	0.57369
		63.0958	0.50271
		100	0.43229
		158.489	0.36473
		251.189	0.30515
		398.107	0.25418
		630.957	0.21166
		1000	0.17469
