# Supplementary material for: Crash landing of Vibrio cholerae by MSHA pili-assisted braking and anchoring in a viscoelastic environment
Source: eLife. 2021 Jul 2;10:e60655. doi: 10.7554/eLife.60655 (PMC8282333; doi:10.7554/eLife.60655)
Supplement: Figure 6—source data 5. [file elife-60655-fig6-data5.xlsx]

## Sheet: Figure 6e
		Oscillation strain	Storage modulus	Loss modulus
		%	Pa	Pa
		0.00394	91.8962	31.9839
		0.00665	77.1478	57.3133
		0.01053	68.5359	52.2365
		0.01516	78.3725	50.3097
		0.02416	86.0319	52.7871
		0.04003	85.1521	52.3042
		0.06232	87.1197	56.9522
		0.09894	89.0571	58.8409
		0.15774	90.235	59.2223
		0.25223	89.9677	62.0354
		0.39842	89.8775	63.3743
		0.62589	91.1258	65.6737
		1.01407	87.3362	66.9815
		1.64823	78.9019	62.3859
		2.63336	70.7268	53.6341
		4.07475	68.7239	47.167
		6.48499	67.1358	40.5287
		11.1505	52.0994	31.8821
		19.2113	30.1862	19.972
		29.0945	19.7041	14.7521
		46.2117	11.9468	10.6503
		76.0205	6.15817	6.7786
		123.373	2.16752	3.52934
