# Supplementary material for: Crash landing of Vibrio cholerae by MSHA pili-assisted braking and anchoring in a viscoelastic environment
Source: eLife. 2021 Jul 2;10:e60655. doi: 10.7554/eLife.60655 (PMC8282333; doi:10.7554/eLife.60655)
Supplement: Figure 6—source data 6. [file elife-60655-fig6-data6.xlsx]

## Sheet: FIgure 6f
		Angular frequency	Storage modulus	Loss modulus
		rad/s	Pa	Pa
		0.05	104.569	21.1087
		0.07924	83.2775	20.6516
		0.12559	98.2552	22.9692
		0.19905	96.8723	21.9306
		0.31548	116.887	19.2012
		0.5	113.009	16.0775
		0.79245	113.494	22.5228
		1.25595	109.079	15.434
		1.99053	124.359	28.3677
		3.15477	136.695	16.1969
		4.99999	139.017	11.1582
		7.92448	139.841	27.2943
		12.5594	144.667	38.3153
		19.9053	144.408	26.0712
		31.5478	149.887	34.4058
		49.9999	154.884	41.0647
		79.2435	159.998	46.5005
		100	159.736	48.8996
